# Supplementary material for: Global, regional, and national burden of vascular intestinal disorders, 1990–2021 and predictions to 2035: A systemic analysis for the Global Burden of Disease Study
Source: Research Square preprint supplement (doi:10.21203/rs.3.rs-6709314/v1), 2025-06-20
Supplement: Supplementary file 1 [file 3cbcfdf4fd9ba20f0211f8cf.xlsx]

## Sheet: Sheet1
	Supplementary table1:Decomposition Analysis of Incidence, Death, and DALYs by Gender in China and Globally
China		Sex	Overall_difference	Age	Population	Epidemiological changes	Age percent	Population percent	Epidemiological changes percent	Val 1990	val 2021	diff1
	Incidence	Both	88745.4	50958.6	45121.4	-7334.55	57.42	50.84	-8.26	52566.9	100165	47597.7
		Male	47453.9	27045.7	23920.9	-3512.75	56.99	50.41	-7.4	27661.1	52467.1	24806
		Female	41661.3	24108.6	21353	-3800.34	57.87	51.25	-9.12	24905.8	47697.4	22791.6
	Death	Both	1067.14	813.208	631.276	-377.34	76.2	59.16	-35.36	651.783	817.54	165.76
		Male	402.79	305.924	240.582	-143.714	75.95	59.73	-35.68	347.864	431.778	83.91
		Female	557.34	426.827	335.658	-205.146	76.58	60.22	-36.81	303.918	385.762	81.84
	DALYs	Both	11703.2	11501.7	9812.68	-9611.13	98.28	83.85	-82.12	20169.7	17820.1	-2349.62
		Male	5490.34	5552.12	4833.81	-4895.59	101.13	88.04	-89.17	11513.2	10212	-1301.19
		Female	5352.54	5298.46	4523.93	-4469.84	98.99	84.52	-83.51	8656.56	7608.12	-1048.43
Global	Incidence	Both	3.0277e+06	1.12347e+06	2.02697e+06	-122737	37.11	66.95	-4.05	757507	1.34702e+06	589514
		Male	1.48398e+06	551761	974380	-42164.1	37.18	65.66	-2.84	345316	630636	285320
		Female	1.50674e+06	557746	1.02073e+06	-71734.2	37.02	67.74	-4.76	412191	716384	304193
	Death	Both	101432	56854.8	63985.1	-19408.1	56.05	63.08	-19.13	57131.5	91514.9	34383.4
		Male	41616.8	23721.9	26067.5	-8172.62	57	62.64	-19.64	24129	38363.7	14234.7
		Female	57006	31440.9	36337.6	-10772.4	55.15	63.74	-18.9	33002.5	53151.2	20148.7
	DALYs	Both	101432	56854.8	63985.1	-19408.1	56.05	63.08	-19.13	57131.5	91514.9	34383.4
		Male	41616.8	23721.9	26067.5	-8172.62	57	62.64	-19.64	24129	38363.7	14234.7
		Female	57006	31440.9	36337.6	-10772.4	55.15	63.74	-18.9	33002.5	53151.2	20148.7
