# Supplementary material for: Global, regional, and national burden of vascular intestinal disorders, 1990–2021 and predictions to 2035: A systemic analysis for the Global Burden of Disease Study
Source: Research Square preprint supplement (doi:10.21203/rs.3.rs-6709314/v1), 2025-06-20
Supplement: Supplementary file 2 [file 812013406774e0d64e3f1538.xlsx]

## Sheet: Sheet1
	China				Global
Year/Sex/Measure	Male/ASIR	Female/ASIR	Male/ASMR	Female/ASMR	Male/ASIR	Female/ASIR	Male/ASMR	Female/ASMR
2022	5.47 (5.4, 5.53)	4.61 (4.56, 4.66)	0.06 (0.05, 0.06)	0.04 (0.03, 0.04)	15.82 (15.77, 15.87)	15.61 (15.54, 15.69)	1.06 (1.04, 1.07)	1.11 (1.09, 1.13)
2023	5.47 (5.27, 5.67)	4.6 (4.44, 4.76)	0.06 (0.04, 0.07)	0.04 (0.03, 0.04)	15.61 (15.5, 15.73)	15.4 (15.24, 15.56)	1.03 (1, 1.07)	1.09 (1.06, 1.12)
2024	5.47 (5.08, 5.86)	4.59 (4.29, 4.9)	0.06 (0.04, 0.08)	0.03 (0.02, 0.05)	15.41 (15.22, 15.6)	15.19 (14.92, 15.46)	1.01 (0.96, 1.06)	1.06 (1.02, 1.11)
2025	5.46 (4.88, 6.04)	4.58 (4.14, 5.03)	0.06 (0.03, 0.08)	0.03 (0.02, 0.05)	15.21 (14.92, 15.49)	14.97 (14.58, 15.37)	0.99 (0.92, 1.05)	1.04 (0.97, 1.11)
2026	5.46 (4.71, 6.2)	4.58 (4, 5.16)	0.06 (0.02, 0.09)	0.03 (0.01, 0.05)	15 (14.62, 15.39)	14.76 (14.22, 15.3)	0.97 (0.89, 1.04)	1.02 (0.93, 1.1)
2027	5.45 (4.57, 6.33)	4.58 (3.89, 5.27)	0.06 (0.02, 0.1)	0.03 (0.01, 0.05)	14.8 (14.3, 15.29)	14.55 (13.86, 15.24)	0.94 (0.85, 1.03)	0.99 (0.89, 1.1)
2028	5.45 (4.47, 6.43)	4.58 (3.8, 5.36)	0.06 (0.01, 0.1)	0.03 (0.01, 0.05)	14.6 (13.98, 15.21)	14.33 (13.48, 15.19)	0.92 (0.82, 1.03)	0.97 (0.84, 1.1)
2029	5.45 (4.4, 6.5)	4.58 (3.73, 5.43)	0.06 (0.01, 0.11)	0.03 (0, 0.05)	14.39 (13.65, 15.13)	14.12 (13.09, 15.15)	0.9 (0.78, 1.02)	0.95 (0.79, 1.1)
2030	5.45 (4.34, 6.56)	4.58 (3.68, 5.49)	0.06 (0, 0.11)	0.02 (0, 0.05)	14.19 (13.31, 15.06)	13.91 (12.69, 15.13)	0.88 (0.74, 1.01)	0.92 (0.74, 1.11)
2031	5.45 (4.3, 6.61)	4.58 (3.63, 5.54)	0.06 (0, 0.12)	0.02 (-0.01, 0.05)	13.98 (12.97, 15)	13.7 (12.28, 15.11)	0.85 (0.71, 1)	0.9 (0.69, 1.11)
2032	5.45 (4.26, 6.65)	4.59 (3.59, 5.58)	0.06 (-0.01, 0.12)	0.02 (-0.01, 0.05)	13.78 (12.61, 14.95)	13.48 (11.86, 15.11)	0.83 (0.67, 0.99)	0.88 (0.64, 1.12)
2033	5.45 (4.21, 6.7)	4.59 (3.54, 5.63)	0.06 (-0.01, 0.13)	0.02 (-0.01, 0.05)	13.58 (12.25, 14.9)	13.27 (11.43, 15.11)	0.81 (0.64, 0.98)	0.85 (0.58, 1.12)
2034	5.45 (4.16, 6.75)	4.58 (3.5, 5.67)	0.06 (-0.02, 0.13)	0.02 (-0.02, 0.05)	13.37 (11.89, 14.86)	13.06 (10.99, 15.13)	0.79 (0.6, 0.97)	0.83 (0.53, 1.13)
2035	5.45 (4.11, 6.8)	4.58 (3.46, 5.71)	0.06 (-0.02, 0.13)	0.01 (-0.02, 0.05)	13.17 (11.52, 14.82)	12.84 (10.54, 15.15)	0.76 (0.56, 0.97)	0.81 (0.47, 1.14)
2036	5.45 (4.06, 6.85)	4.58 (3.42, 5.75)	0.06 (-0.03, 0.14)	0.01 (-0.02, 0.04)	12.96 (11.14, 14.79)	12.63 (10.08, 15.18)	0.74 (0.53, 0.96)	0.78 (0.42, 1.15)
