# Supplementary material for: Global, regional, and national burden of vascular intestinal disorders, 1990–2021 and predictions to 2035: A systemic analysis for the Global Burden of Disease Study
Source: Research Square preprint supplement (doi:10.21203/rs.3.rs-6709314/v1), 2025-06-20
Supplement: Supplementary file 3 [file ce616ede37a831fc15c1bd9a.xlsx]

## Sheet: Sheet1
Supplementary table2 Net drift and P-values of Age-Period-Cohort (APC) Model for Global and Chinese Vascular Intestinal Disorders (VID) Incidence, Prevalence, Mortality, and DALYs
												Global
Incidence			Prevalence			Morality			DALYs			Incidence			Prevalence			Morality			DALYs
Net Drift (%/year)	CI Lo	CI Hi	Net Drift (%/year)	CI Lo	CI Hi	Net Drift (%/year)	CI Lo	CI Hi	Net Drift (%/year)	CI Lo	CI Hi	Net Drift (%/year)	CI Lo	CI Hi	Net Drift (%/year)	CI Lo	CI Hi	Net Drift (%/year)	CI Lo	CI Hi	Net Drift (%/year)	CI Lo	CI Hi
-1.007	-1.0993	-0.9146	-0.7752	-0.9246	-0.6255	-4.7909	-5.453	-4.1243	-4.1066	-4.2279	-3.9852	-0.3444	-0.4352	-0.2535	-0.3909	-0.4725	-0.3092	-1.1866	-1.4402	-0.9324	-0.7752	-0.9246	-0.6255
