# Supplementary material for: Global, regional, and national burden of vascular intestinal disorders, 1990–2021 and predictions to 2035: A systemic analysis for the Global Burden of Disease Study
Source: Research Square preprint supplement (doi:10.21203/rs.3.rs-6709314/v1), 2025-06-20
Supplement: Supplementary file 4 [file e3de58e04ac50d84315a592e.xlsx]

## Sheet: Table 5
Location	Region	Super region	1990	1991	1992	1993	1994	1995	1996	1997	1998	1999	2000	2001	2002	2003	2004	2005	2006	2007	2008	2009	2010	2011	2012	2013	2014	2015	2016	2017	2018	2019	2020	2021
Afghanistan	North Africa and Middle East	North Africa and Middle East	0.173832	0.176473	0.179634	0.180184	0.178519	0.178279	0.178085	0.177884	0.177513	0.177075	0.177026	0.177773	0.183808	0.190519	0.196904	0.203928	0.211074	0.219628	0.228089	0.237901	0.24776	0.257042	0.266484	0.275637	0.28403	0.29185	0.299631	0.307425	0.314866	0.322454	0.32983	0.3372
Albania	Central Europe	Central Europe, eastern Europe, and central Asia	0.557773	0.555629	0.553108	0.552453	0.553764	0.557041	0.562249	0.566803	0.572534	0.578295	0.584664	0.592413	0.599866	0.606971	0.613864	0.62068	0.627486	0.634168	0.640766	0.646816	0.652654	0.658197	0.663557	0.66874	0.674113	0.679669	0.685037	0.690379	0.695567	0.700288	0.70379	0.70685
Algeria	North Africa and Middle East	North Africa and Middle East	0.460487	0.468319	0.475951	0.483256	0.490451	0.497958	0.505991	0.514057	0.522382	0.530786	0.539482	0.547529	0.555172	0.562537	0.569353	0.576002	0.582126	0.587791	0.593191	0.59787	0.602824	0.607826	0.612704	0.617422	0.622087	0.626746	0.631711	0.636973	0.6425	0.648211	0.653651	0.659501
American Samoa	Oceania	Southeast Asia, east Asia, and Oceania	0.613634	0.615848	0.618584	0.622079	0.626053	0.629814	0.632707	0.634927	0.636598	0.638322	0.64061	0.643214	0.646002	0.648952	0.651921	0.655061	0.657726	0.660781	0.664026	0.667301	0.671249	0.675979	0.680862	0.685833	0.691343	0.697163	0.702726	0.707648	0.712801	0.717308	0.720839	0.723728
Andorra	Western Europe	High income	0.761464	0.764709	0.767188	0.768954	0.770024	0.770989	0.772403	0.774581	0.776973	0.77963	0.781977	0.785417	0.790159	0.797279	0.804732	0.812214	0.819787	0.826617	0.831822	0.83593	0.83949	0.842795	0.845811	0.84833	0.85101	0.853591	0.856257	0.859477	0.862589	0.865621	0.867449	0.869444
Angola	Central Sub-Saharan Africa	Sub-Saharan Africa	0.270737	0.275161	0.279232	0.281868	0.284488	0.287448	0.291421	0.295434	0.299553	0.30372	0.307603	0.311698	0.316707	0.321777	0.327395	0.333785	0.341013	0.348847	0.357082	0.364408	0.372034	0.380007	0.387892	0.395796	0.40372	0.411372	0.418822	0.426177	0.433355	0.440455	0.447284	0.453722
Antigua and Barbuda	Caribbean	Latin America and Caribbean	0.612105	0.618817	0.624696	0.630076	0.634769	0.638009	0.641647	0.645896	0.650614	0.655535	0.660819	0.665621	0.670361	0.675311	0.680412	0.685486	0.690826	0.69636	0.702175	0.707129	0.711432	0.71549	0.719509	0.722865	0.725586	0.728373	0.731599	0.734964	0.738879	0.743053	0.746345	0.749887
Argentina	Southern Latin America	Latin America and Caribbean	0.587397	0.591708	0.597996	0.603739	0.609787	0.614474	0.618943	0.623934	0.628723	0.633175	0.638194	0.642176	0.644473	0.645907	0.648297	0.653369	0.657446	0.660188	0.663079	0.665912	0.669926	0.675243	0.679218	0.681633	0.684975	0.69171	0.698618	0.705136	0.712889	0.719003	0.721294	0.723123
Armenia	Central Asia	Central Europe, eastern Europe, and central Asia	0.544415	0.547562	0.548975	0.551215	0.553784	0.556816	0.560538	0.564627	0.569557	0.574323	0.579438	0.585419	0.592711	0.600809	0.609032	0.61776	0.626688	0.635871	0.644432	0.649715	0.654812	0.659818	0.664833	0.669534	0.673932	0.678055	0.681746	0.68598	0.690277	0.694766	0.698269	0.701833
Australia	Australasia	High income	0.725983	0.72976	0.733901	0.738375	0.742847	0.747427	0.751992	0.756634	0.761133	0.765698	0.770224	0.774663	0.779361	0.7836	0.787017	0.789616	0.791156	0.792533	0.795293	0.799174	0.803562	0.80752	0.811644	0.816454	0.820841	0.824861	0.82856	0.831798	0.835355	0.839317	0.842051	0.844253
Austria	Western Europe	High income	0.749854	0.751653	0.754375	0.758805	0.764704	0.769827	0.774447	0.779233	0.783521	0.787452	0.791848	0.79577	0.799154	0.802043	0.804889	0.808419	0.812065	0.815481	0.818794	0.821541	0.8245	0.828002	0.831113	0.83368	0.835839	0.83758	0.839884	0.843173	0.846614	0.849863	0.85202	0.853837
Azerbaijan	Central Asia	Central Europe, eastern Europe, and central Asia	0.595986	0.595808	0.594651	0.593543	0.592089	0.589441	0.586316	0.583222	0.580393	0.579193	0.580021	0.582194	0.585716	0.590039	0.594646	0.602485	0.613771	0.626111	0.636901	0.645163	0.652057	0.657972	0.662897	0.667659	0.672163	0.676245	0.679808	0.683263	0.686561	0.689835	0.692605	0.694851
Bahrain	North Africa and Middle East	North Africa and Middle East	0.584579	0.590597	0.59604	0.602166	0.608134	0.613851	0.619485	0.624596	0.630738	0.638083	0.646751	0.657196	0.664901	0.669564	0.674148	0.679791	0.686144	0.693045	0.699806	0.704886	0.707903	0.708959	0.710362	0.713343	0.716768	0.719927	0.723611	0.729323	0.736193	0.742848	0.748103	0.753043
Bangladesh	South Asia	South Asia	0.228549	0.237207	0.245248	0.252091	0.258997	0.265294	0.271178	0.277773	0.284516	0.290951	0.297252	0.303189	0.30864	0.31436	0.320923	0.328091	0.335691	0.343933	0.35252	0.361482	0.370599	0.380125	0.390624	0.401706	0.413263	0.425482	0.43771	0.449752	0.461718	0.473265	0.483079	0.492421
Barbados	Caribbean	Latin America and Caribbean	0.653583	0.656654	0.662447	0.668815	0.673409	0.676012	0.677193	0.678645	0.679827	0.680398	0.681304	0.683329	0.687808	0.693236	0.69803	0.70151	0.703856	0.705872	0.708514	0.712143	0.716209	0.720061	0.724162	0.727826	0.730383	0.732603	0.734913	0.737157	0.739531	0.742239	0.744367	0.746749
Belarus	Eastern Europe	Central Europe, eastern Europe, and central Asia	0.622447	0.627038	0.632892	0.639394	0.644653	0.64896	0.652855	0.655627	0.657246	0.660171	0.664706	0.671333	0.678122	0.684869	0.692502	0.698985	0.705119	0.711497	0.719121	0.727293	0.734955	0.739504	0.743469	0.748529	0.753511	0.758206	0.764328	0.771131	0.776569	0.780508	0.782382	0.784485
Belgium	Western Europe	High income	0.737391	0.742173	0.748012	0.753685	0.758904	0.76317	0.766826	0.770814	0.774228	0.777041	0.780396	0.784713	0.788836	0.792014	0.795225	0.798497	0.801573	0.804613	0.807758	0.811056	0.81503	0.81947	0.824226	0.82862	0.832425	0.835878	0.839463	0.843212	0.846618	0.849498	0.851347	0.853654
Belize	Caribbean	Latin America and Caribbean	0.423727	0.433834	0.444199	0.455259	0.465729	0.475279	0.482702	0.48802	0.491819	0.49507	0.498644	0.502399	0.506872	0.512679	0.519697	0.527231	0.53489	0.541901	0.548093	0.553466	0.558547	0.56344	0.568456	0.573236	0.578091	0.583279	0.588276	0.593337	0.598512	0.603352	0.60706	0.610229
Benin	Western Sub-Saharan Africa	Sub-Saharan Africa	0.218907	0.222539	0.226323	0.230313	0.234032	0.23801	0.241895	0.245732	0.249376	0.253215	0.257381	0.261388	0.265417	0.269544	0.273941	0.278407	0.282934	0.287673	0.292627	0.297702	0.302809	0.307926	0.313374	0.319319	0.325727	0.332216	0.338764	0.345607	0.352653	0.360031	0.366964	0.373487
Bermuda	Caribbean	Latin America and Caribbean	0.696451	0.700277	0.703984	0.707678	0.711069	0.714469	0.717832	0.721643	0.725854	0.73054	0.735997	0.741919	0.747545	0.753305	0.759009	0.764691	0.770597	0.776114	0.780358	0.784759	0.789181	0.793381	0.797485	0.801388	0.804923	0.807999	0.810551	0.812807	0.814893	0.817	0.819203	0.821365
Bhutan	South Asia	South Asia	0.21504	0.221312	0.228148	0.236005	0.244331	0.253292	0.262363	0.271487	0.28044	0.28951	0.298805	0.308201	0.317944	0.32767	0.337286	0.346999	0.356824	0.36756	0.378234	0.388977	0.399752	0.410149	0.419443	0.427791	0.434969	0.441811	0.448402	0.45428	0.459625	0.464633	0.468714	0.473062
Bolivia	Andean Latin America	Latin America and Caribbean	0.423918	0.429398	0.434836	0.440602	0.446823	0.453479	0.460221	0.466983	0.473796	0.480194	0.486328	0.492031	0.497349	0.502366	0.507273	0.512166	0.517146	0.521946	0.526944	0.531792	0.537009	0.542681	0.548615	0.554788	0.560935	0.567001	0.57308	0.579241	0.585184	0.590692	0.594854	0.599011
Bosnia and Herzegovina	Central Europe	Central Europe, eastern Europe, and central Asia	0.541133	0.541346	0.539303	0.536032	0.533853	0.534026	0.545549	0.563565	0.58183	0.597997	0.610951	0.621989	0.632076	0.640635	0.647794	0.653859	0.659814	0.665579	0.671101	0.676033	0.680824	0.685399	0.689507	0.693509	0.697032	0.700446	0.704079	0.708053	0.712347	0.716857	0.720202	0.723078
Botswana	Southern Sub-Saharan Africa	Sub-Saharan Africa	0.418078	0.429752	0.440491	0.450524	0.459955	0.469267	0.478588	0.487768	0.496194	0.504979	0.513498	0.52137	0.529253	0.537	0.544349	0.551707	0.559222	0.566702	0.573884	0.579696	0.585824	0.591985	0.59774	0.604065	0.610086	0.615411	0.620798	0.625705	0.630607	0.635324	0.639275	0.642722
Brazil	Tropical Latin America	Latin America and Caribbean	0.500071	0.504785	0.50854	0.512082	0.515761	0.519686	0.523863	0.528178	0.532481	0.536972	0.542051	0.547304	0.552776	0.558146	0.563773	0.569458	0.575339	0.581589	0.588078	0.594073	0.600446	0.606777	0.612619	0.618218	0.623434	0.62815	0.632235	0.636422	0.640803	0.645298	0.649202	0.653044
Brunei	High-income Asia Pacific	High income	0.666082	0.671234	0.676703	0.682175	0.687394	0.692471	0.697602	0.702944	0.70863	0.714851	0.721552	0.728535	0.735344	0.741578	0.747312	0.752482	0.757319	0.761643	0.765714	0.769602	0.773219	0.776632	0.780217	0.784017	0.787733	0.791368	0.794981	0.79831	0.801437	0.804499	0.807424	0.810234
Bulgaria	Central Europe	Central Europe, eastern Europe, and central Asia	0.633446	0.643069	0.651187	0.659162	0.66743	0.674	0.678863	0.680221	0.678497	0.677447	0.681005	0.686487	0.691512	0.695566	0.699882	0.704471	0.708868	0.713192	0.717672	0.723677	0.730702	0.735749	0.739178	0.742136	0.745373	0.748979	0.752259	0.755666	0.759148	0.76236	0.76509	0.768151
Burkina Faso	Western Sub-Saharan Africa	Sub-Saharan Africa	0.129696	0.133299	0.136595	0.139825	0.142849	0.146116	0.150042	0.154228	0.158707	0.163468	0.168084	0.172996	0.177982	0.183254	0.188565	0.194086	0.199572	0.204891	0.210223	0.215423	0.221001	0.226697	0.232589	0.238497	0.244379	0.250208	0.256082	0.262033	0.268102	0.274287	0.279871	0.285118
Burundi	Eastern Sub-Saharan Africa	Sub-Saharan Africa	0.205867	0.208496	0.210865	0.213249	0.215223	0.215632	0.215526	0.215762	0.216403	0.216856	0.21687	0.216989	0.217782	0.218962	0.220919	0.223084	0.225822	0.228997	0.232854	0.236943	0.241448	0.246277	0.251572	0.257191	0.262795	0.267328	0.271588	0.275841	0.279733	0.283443	0.286496	0.289374
Cambodia	Southeast Asia	Southeast Asia, east Asia, and Oceania	0.289075	0.292479	0.296901	0.301627	0.305723	0.310679	0.315631	0.320504	0.324974	0.330224	0.336075	0.342508	0.349466	0.35693	0.364855	0.373332	0.381698	0.389876	0.39768	0.404221	0.410211	0.415964	0.42177	0.427715	0.433598	0.439487	0.445358	0.451222	0.457341	0.463643	0.468876	0.473621
Cameroon	Western Sub-Saharan Africa	Sub-Saharan Africa	0.303055	0.309623	0.315601	0.320832	0.32541	0.329539	0.333426	0.337346	0.341197	0.344955	0.348815	0.352632	0.356512	0.360669	0.3651	0.369546	0.374356	0.37949	0.384838	0.390289	0.396067	0.402093	0.40858	0.415608	0.423034	0.43083	0.438879	0.447185	0.455688	0.464246	0.472286	0.479691
Canada	High-income North America	High income	0.781978	0.784159	0.787031	0.789717	0.792599	0.796521	0.801065	0.804833	0.808135	0.812266	0.816685	0.820696	0.824402	0.827801	0.830928	0.833288	0.834916	0.836625	0.838914	0.841584	0.844853	0.848018	0.850978	0.853845	0.85676	0.859533	0.862174	0.865054	0.867906	0.870554	0.871993	0.873171
Cape Verde	Western Sub-Saharan Africa	Sub-Saharan Africa	0.276723	0.282932	0.28846	0.294517	0.302217	0.310676	0.319736	0.32905	0.338786	0.349297	0.359899	0.37007	0.379847	0.38942	0.398839	0.408009	0.417434	0.42738	0.437372	0.446692	0.455648	0.464474	0.472858	0.480796	0.48826	0.495229	0.501855	0.508436	0.515286	0.522488	0.528462	0.533535
Central African Republic	Central Sub-Saharan Africa	Sub-Saharan Africa	0.216825	0.220192	0.223008	0.225451	0.228488	0.231697	0.23399	0.236672	0.239744	0.242989	0.246021	0.249247	0.252524	0.255102	0.257779	0.260452	0.263712	0.267332	0.271158	0.275339	0.279981	0.285097	0.29046	0.290105	0.289999	0.290828	0.29243	0.294752	0.298011	0.301953	0.305426	0.309168
Chad	Western Sub-Saharan Africa	Sub-Saharan Africa	0.114639	0.117955	0.121133	0.1236	0.126081	0.128289	0.130169	0.132136	0.13409	0.135825	0.137412	0.139664	0.142042	0.145348	0.150911	0.157033	0.162576	0.168161	0.173397	0.178335	0.184111	0.189592	0.195263	0.200953	0.206659	0.212429	0.217532	0.222207	0.226914	0.231705	0.236103	0.240436
Chile	Southern Latin America	Latin America and Caribbean	0.586495	0.593007	0.599106	0.604829	0.610674	0.617235	0.623694	0.63054	0.638083	0.645928	0.652989	0.660266	0.667888	0.673446	0.678258	0.682589	0.685893	0.68893	0.69236	0.696602	0.702305	0.708598	0.714743	0.720449	0.727276	0.736098	0.744972	0.752058	0.758626	0.76512	0.769214	0.771515
China	East Asia	Southeast Asia, east Asia, and Oceania	0.458669	0.467302	0.475784	0.484354	0.492579	0.501501	0.512034	0.522327	0.531379	0.540334	0.547989	0.55368	0.560543	0.569019	0.578178	0.588052	0.598758	0.60952	0.619455	0.629308	0.641521	0.651448	0.657144	0.663103	0.668641	0.67194	0.676218	0.68462	0.693718	0.703687	0.713365	0.72163
Colombia	Central Latin America	Latin America and Caribbean	0.48072	0.48234	0.484572	0.488229	0.493278	0.499103	0.504987	0.51108	0.517023	0.522436	0.527839	0.533077	0.538189	0.543265	0.548602	0.554089	0.560183	0.566823	0.573495	0.579876	0.586408	0.59334	0.600254	0.607251	0.614152	0.620889	0.627554	0.63413	0.640255	0.646039	0.650855	0.655443
Comoros	Eastern Sub-Saharan Africa	Sub-Saharan Africa	0.270048	0.279146	0.288506	0.297607	0.305707	0.31422	0.322249	0.330148	0.337518	0.344775	0.351876	0.359212	0.366486	0.373411	0.380036	0.386892	0.393521	0.399051	0.40465	0.410254	0.415543	0.421093	0.42673	0.43279	0.438845	0.444712	0.450507	0.456281	0.461951	0.467388	0.472003	0.475979
Congo	Central Sub-Saharan Africa	Sub-Saharan Africa	0.420655	0.426734	0.431988	0.436607	0.440168	0.443744	0.447567	0.451027	0.454445	0.457177	0.460765	0.463752	0.467037	0.470134	0.473612	0.478138	0.483356	0.487641	0.492823	0.4983	0.505543	0.513816	0.522928	0.531552	0.540594	0.548414	0.555109	0.561834	0.567794	0.573374	0.578452	0.583075
Cook Islands	Oceania	Southeast Asia, east Asia, and Oceania	0.564515	0.570623	0.577123	0.584059	0.591541	0.59879	0.606414	0.613992	0.621202	0.628029	0.635366	0.644421	0.65279	0.661465	0.66877	0.674004	0.680644	0.687505	0.695592	0.703777	0.711862	0.719445	0.726963	0.733317	0.739596	0.74655	0.752353	0.758234	0.764041	0.769796	0.774701	0.77911
Costa Rica	Central Latin America	Latin America and Caribbean	0.534125	0.539342	0.544624	0.549947	0.555171	0.560547	0.565181	0.570128	0.576067	0.582229	0.588243	0.594889	0.600894	0.605766	0.610316	0.614413	0.61785	0.621201	0.625704	0.631291	0.636595	0.641201	0.646574	0.651946	0.65689	0.66203	0.66743	0.673621	0.681296	0.690049	0.696195	0.70034
Cote d'Ivoire	Western Sub-Saharan Africa	Sub-Saharan Africa	0.27932	0.286493	0.293451	0.299743	0.305211	0.310106	0.314965	0.319844	0.324713	0.329201	0.333015	0.336546	0.339978	0.343349	0.346375	0.348728	0.350716	0.352727	0.355088	0.357939	0.361205	0.364084	0.367832	0.372354	0.377575	0.383491	0.389825	0.396694	0.404092	0.411726	0.41904	0.425942
Croatia	Central Europe	Central Europe, eastern Europe, and central Asia	0.668906	0.674725	0.678093	0.678221	0.677548	0.677029	0.679507	0.685365	0.691366	0.696636	0.70304	0.709537	0.715383	0.72113	0.726328	0.732154	0.738067	0.743149	0.74847	0.754066	0.759472	0.763686	0.767405	0.771152	0.774479	0.777866	0.781444	0.785075	0.788671	0.792475	0.795462	0.798341
Cuba	Caribbean	Latin America and Caribbean	0.558019	0.563414	0.566169	0.565441	0.563186	0.560766	0.559346	0.558925	0.559363	0.561821	0.566677	0.572754	0.579968	0.587648	0.594349	0.599864	0.604971	0.607618	0.609401	0.611776	0.615261	0.620387	0.626156	0.63184	0.637304	0.642819	0.647908	0.652309	0.656859	0.661675	0.665211	0.66873
Cyprus	Western Europe	High income	0.648231	0.655726	0.666012	0.677547	0.688829	0.699924	0.70984	0.718864	0.727964	0.736846	0.745199	0.753595	0.761502	0.767896	0.773765	0.779031	0.784561	0.792068	0.799454	0.805112	0.80984	0.813726	0.816979	0.819381	0.821184	0.822733	0.824284	0.82614	0.828343	0.830981	0.83306	0.835631
Czech Republic	Central Europe	Central Europe, eastern Europe, and central Asia	0.681848	0.688003	0.697578	0.710853	0.72597	0.737982	0.746041	0.75168	0.757034	0.762429	0.767766	0.772167	0.776928	0.782448	0.787126	0.791334	0.794923	0.798254	0.801765	0.804962	0.808747	0.812055	0.81423	0.815615	0.816227	0.816565	0.817153	0.819068	0.822034	0.824784	0.826627	0.82845
Democratic Republic of the Congo	Central Sub-Saharan Africa	Sub-Saharan Africa	0.289843	0.290432	0.290959	0.289629	0.286859	0.283968	0.280413	0.276337	0.271814	0.267368	0.262457	0.257858	0.254136	0.252334	0.252471	0.254161	0.257355	0.262272	0.268104	0.274361	0.282224	0.290873	0.300455	0.310831	0.321623	0.332421	0.341989	0.351102	0.360288	0.369341	0.376712	0.38318
Denmark	Western Europe	High income	0.801155	0.80454	0.808164	0.811586	0.815139	0.819105	0.823375	0.82768	0.831683	0.835382	0.839184	0.843178	0.847086	0.850441	0.853304	0.855691	0.858033	0.859782	0.861782	0.863948	0.866767	0.869779	0.872518	0.874933	0.876815	0.878544	0.88059	0.883688	0.88753	0.891625	0.894368	0.896424
Djibouti	Eastern Sub-Saharan Africa	Sub-Saharan Africa	0.337782	0.33877	0.340986	0.344904	0.347981	0.351246	0.354386	0.358096	0.361597	0.365305	0.369015	0.372853	0.37665	0.380687	0.384988	0.389569	0.395037	0.400619	0.406658	0.411969	0.416999	0.422316	0.427711	0.43336	0.439456	0.445855	0.453443	0.46044	0.467706	0.475263	0.48188	0.487958
Dominica	Caribbean	Latin America and Caribbean	0.563603	0.565238	0.569571	0.578812	0.590119	0.601987	0.614382	0.625057	0.633018	0.639454	0.645831	0.652369	0.658424	0.663679	0.668952	0.674549	0.680342	0.685416	0.690198	0.694462	0.698489	0.702463	0.706871	0.71221	0.718456	0.724786	0.731761	0.736062	0.738936	0.742132	0.74442	0.746967
Dominican Republic	Caribbean	Latin America and Caribbean	0.442654	0.446145	0.449953	0.454229	0.458621	0.463314	0.468517	0.474504	0.481171	0.488179	0.495469	0.502775	0.510298	0.517396	0.524543	0.532229	0.540223	0.548187	0.555371	0.561784	0.568131	0.573835	0.578966	0.583626	0.588237	0.592924	0.59762	0.60214	0.606961	0.611913	0.615636	0.619388
Ecuador	Andean Latin America	Latin America and Caribbean	0.518431	0.517679	0.518379	0.520707	0.524908	0.529381	0.532691	0.53535	0.537196	0.539032	0.543045	0.548552	0.554897	0.560955	0.56629	0.569927	0.572516	0.574705	0.578125	0.582484	0.588763	0.596729	0.605454	0.61408	0.622027	0.628547	0.634281	0.640011	0.645889	0.651788	0.656714	0.661017
Egypt	North Africa and Middle East	North Africa and Middle East	0.417183	0.426909	0.437745	0.44849	0.458727	0.468035	0.476117	0.482971	0.489184	0.495503	0.50217	0.508717	0.515038	0.520623	0.525182	0.528665	0.530396	0.529458	0.524744	0.516256	0.507715	0.504594	0.509157	0.519334	0.53175	0.54437	0.556012	0.566915	0.577443	0.587737	0.597363	0.606787
El Salvador	Central Latin America	Latin America and Caribbean	0.373058	0.374855	0.377077	0.380307	0.385149	0.39178	0.400178	0.410456	0.421421	0.432733	0.443963	0.454178	0.462969	0.470397	0.476537	0.482042	0.486826	0.49081	0.495078	0.49949	0.504171	0.508969	0.513397	0.518122	0.523469	0.529387	0.53565	0.541999	0.548143	0.554032	0.55892	0.563775
Equatorial Guinea	Central Sub-Saharan Africa	Sub-Saharan Africa	0.268784	0.275297	0.283488	0.292236	0.300686	0.310444	0.324601	0.350551	0.371237	0.391128	0.411383	0.43359	0.451939	0.467847	0.48388	0.498684	0.51158	0.524076	0.537019	0.548515	0.559109	0.570277	0.581834	0.592801	0.603473	0.613135	0.621858	0.630235	0.638023	0.645303	0.652125	0.657857
Eritrea	Eastern Sub-Saharan Africa	Sub-Saharan Africa	0.216028	0.222575	0.230296	0.239385	0.250753	0.261498	0.272527	0.283552	0.293765	0.303142	0.310248	0.317248	0.323567	0.328594	0.332879	0.336683	0.339836	0.342843	0.343428	0.345148	0.348146	0.354163	0.360113	0.364344	0.372528	0.376935	0.382172	0.385936	0.391155	0.396331	0.400459	0.403864
Estonia	Eastern Europe	Central Europe, eastern Europe, and central Asia	0.674968	0.685223	0.695587	0.703693	0.708456	0.713173	0.718813	0.724652	0.729027	0.733251	0.739713	0.746602	0.75263	0.757816	0.763224	0.769112	0.774452	0.781074	0.788599	0.794728	0.80083	0.806633	0.811109	0.814887	0.818771	0.823221	0.827364	0.830975	0.834566	0.838574	0.841817	0.844918
Ethiopia	Eastern Sub-Saharan Africa	Sub-Saharan Africa	0.148034	0.1496	0.150174	0.151582	0.152983	0.155086	0.158127	0.161875	0.165078	0.168904	0.173419	0.178973	0.184138	0.188695	0.195031	0.202868	0.211524	0.22182	0.232872	0.244266	0.256081	0.267881	0.279007	0.289885	0.300485	0.310736	0.320432	0.329469	0.33805	0.346423	0.353216	0.358823
Federated States of Micronesia	Oceania	Southeast Asia, east Asia, and Oceania	0.462512	0.468145	0.473793	0.47994	0.4853	0.491015	0.49557	0.49911	0.502862	0.506663	0.511004	0.515317	0.519546	0.52383	0.527611	0.531703	0.535719	0.539431	0.542766	0.546275	0.550123	0.55424	0.557966	0.561083	0.56384	0.567151	0.570458	0.57404	0.577555	0.581195	0.584527	0.587535
Fiji	Oceania	Southeast Asia, east Asia, and Oceania	0.534649	0.538778	0.543189	0.547776	0.552849	0.558531	0.565042	0.571188	0.577172	0.583574	0.589197	0.594497	0.599322	0.60349	0.607545	0.610813	0.613933	0.616583	0.618959	0.620883	0.623309	0.626438	0.629881	0.634278	0.63939	0.645026	0.650743	0.656464	0.661991	0.667061	0.671431	0.675052
Finland	Western Europe	High income	0.756222	0.758411	0.760804	0.763527	0.767102	0.771164	0.774809	0.778814	0.782305	0.785774	0.789985	0.794454	0.79877	0.802325	0.805694	0.808937	0.812081	0.815598	0.818876	0.821458	0.824845	0.828271	0.831434	0.834425	0.837432	0.840878	0.844622	0.848586	0.852203	0.855365	0.857656	0.859831
France	Western Europe	High income	0.730747	0.736452	0.742872	0.748582	0.753176	0.757126	0.7609	0.764651	0.767853	0.770304	0.772792	0.776225	0.780089	0.783179	0.786085	0.789042	0.792322	0.795558	0.798177	0.800509	0.80324	0.806379	0.809615	0.812984	0.816551	0.820238	0.823731	0.827098	0.830449	0.833773	0.836049	0.838365
Gabon	Central Sub-Saharan Africa	Sub-Saharan Africa	0.455421	0.461563	0.467024	0.472394	0.478062	0.483826	0.489461	0.495074	0.500373	0.504806	0.509133	0.513046	0.516918	0.521051	0.525479	0.530489	0.534798	0.539441	0.544111	0.548591	0.554023	0.560232	0.566843	0.573808	0.580916	0.588365	0.596062	0.603816	0.611724	0.619905	0.62761	0.634691
Georgia	Central Asia	Central Europe, eastern Europe, and central Asia	0.739512	0.743491	0.748286	0.752773	0.756509	0.759433	0.761497	0.762817	0.764069	0.765608	0.768348	0.771841	0.774881	0.777197	0.779001	0.779956	0.781722	0.7859	0.792042	0.79908	0.805882	0.811503	0.815983	0.82006	0.82373	0.827364	0.831011	0.834854	0.838524	0.842235	0.844595	0.846564
Germany	Western Europe	High income	0.817078	0.82334	0.828324	0.832287	0.835562	0.837643	0.839188	0.841386	0.843855	0.846232	0.848926	0.85207	0.855067	0.857676	0.86024	0.862894	0.865874	0.86914	0.872553	0.875088	0.877947	0.881028	0.883656	0.885927	0.887652	0.888868	0.890896	0.89405	0.896976	0.899703	0.901439	0.902957
Ghana	Western Sub-Saharan Africa	Sub-Saharan Africa	0.373112	0.379239	0.384857	0.389968	0.394954	0.39993	0.405003	0.410038	0.414889	0.419755	0.424725	0.429412	0.434104	0.439118	0.444237	0.44936	0.454693	0.460606	0.467259	0.473848	0.480778	0.489021	0.497514	0.506005	0.514119	0.521539	0.52863	0.53617	0.543841	0.551632	0.558462	0.56493
Greece	Western Europe	High income	0.674186	0.680316	0.687055	0.693329	0.699153	0.704863	0.710139	0.715687	0.721594	0.727529	0.732711	0.737154	0.741945	0.747186	0.752419	0.756384	0.76021	0.763927	0.767528	0.771247	0.775156	0.778526	0.780789	0.781949	0.782442	0.78249	0.782798	0.784109	0.786	0.788138	0.789632	0.791854
Greenland	High-income North America	High income	0.732258	0.730627	0.729781	0.729895	0.730876	0.730832	0.730216	0.730551	0.733243	0.736557	0.740857	0.74629	0.752878	0.759444	0.765402	0.7721	0.779141	0.785322	0.791441	0.797026	0.803003	0.808105	0.811685	0.814368	0.816527	0.817719	0.818962	0.819781	0.820816	0.82234	0.824359	0.82621
Grenada	Caribbean	Latin America and Caribbean	0.436734	0.445888	0.45591	0.465995	0.47641	0.486559	0.49659	0.506218	0.51659	0.527333	0.538388	0.549059	0.559473	0.569718	0.578487	0.587159	0.594055	0.600766	0.606879	0.611805	0.616487	0.620979	0.624978	0.629048	0.633735	0.638936	0.644335	0.649832	0.655373	0.660809	0.665086	0.668993
Guam	Oceania	Southeast Asia, east Asia, and Oceania	0.67622	0.669974	0.666356	0.667318	0.672112	0.67812	0.684174	0.691685	0.701819	0.713642	0.724802	0.734267	0.741284	0.745912	0.749017	0.750866	0.751176	0.752625	0.755152	0.758252	0.761484	0.763987	0.766846	0.770225	0.773442	0.776724	0.780512	0.785555	0.791295	0.796775	0.800969	0.803982
Guatemala	Central Latin America	Latin America and Caribbean	0.311792	0.314329	0.319165	0.326841	0.333469	0.339642	0.346961	0.355996	0.366461	0.374455	0.379877	0.386928	0.3969	0.408234	0.419777	0.430328	0.438856	0.447246	0.456542	0.464003	0.470477	0.47691	0.481863	0.487287	0.494027	0.500656	0.50715	0.513736	0.520995	0.52863	0.534571	0.539972
Guinea	Western Sub-Saharan Africa	Sub-Saharan Africa	0.178295	0.181459	0.184485	0.187686	0.191129	0.194573	0.198634	0.20328	0.208003	0.212413	0.21665	0.221091	0.225899	0.230523	0.235135	0.239692	0.24401	0.248472	0.253168	0.257553	0.262406	0.267625	0.273428	0.2796	0.285961	0.292364	0.299112	0.306881	0.31484	0.32284	0.329878	0.336401
Guinea-Bissau	Western Sub-Saharan Africa	Sub-Saharan Africa	0.207615	0.212506	0.217026	0.221679	0.226435	0.231224	0.236106	0.241361	0.244372	0.248217	0.252027	0.255787	0.259322	0.262748	0.266272	0.270056	0.273804	0.277805	0.282152	0.286423	0.291142	0.296683	0.301562	0.306602	0.311603	0.31709	0.32298	0.329326	0.335668	0.342156	0.347799	0.35311
Guyana	Caribbean	Latin America and Caribbean	0.46043	0.462677	0.466754	0.472174	0.478993	0.486573	0.495216	0.504363	0.513069	0.521596	0.528694	0.53487	0.540514	0.545516	0.550326	0.554845	0.559466	0.564541	0.569595	0.57477	0.580084	0.585688	0.591337	0.596826	0.602137	0.607605	0.613914	0.620603	0.627167	0.63364	0.642285	0.650812
Haiti	Caribbean	Latin America and Caribbean	0.310335	0.315455	0.32039	0.324896	0.328399	0.332999	0.338229	0.34388	0.349698	0.355981	0.362572	0.368644	0.374473	0.380067	0.385062	0.389845	0.394322	0.398973	0.403286	0.407944	0.41184	0.416177	0.420022	0.423986	0.427941	0.431757	0.435289	0.438541	0.441679	0.444329	0.446391	0.448278
Honduras	Central Latin America	Latin America and Caribbean	0.332043	0.337035	0.342306	0.347838	0.353165	0.358787	0.364328	0.369984	0.37595	0.381752	0.387988	0.394174	0.400372	0.406668	0.413062	0.419612	0.426353	0.43324	0.439998	0.446151	0.452382	0.4587	0.464925	0.470767	0.476588	0.482294	0.487706	0.493131	0.498657	0.504157	0.508669	0.513037
Hungary	Central Europe	Central Europe, eastern Europe, and central Asia	0.64942	0.653707	0.660383	0.667544	0.675051	0.683186	0.690883	0.697936	0.704203	0.709981	0.715805	0.722099	0.728385	0.734451	0.7401	0.745357	0.750515	0.754943	0.759317	0.763564	0.767329	0.769702	0.770784	0.771562	0.772575	0.774047	0.77615	0.779116	0.782084	0.78491	0.78762	0.790755
Iceland	Western Europe	High income	0.764213	0.769027	0.772706	0.776389	0.779968	0.78274	0.785356	0.788528	0.792626	0.797369	0.80303	0.808966	0.8134	0.816597	0.819528	0.822767	0.826245	0.83029	0.834623	0.838121	0.841385	0.84462	0.847299	0.850174	0.853559	0.857725	0.861844	0.865703	0.86922	0.872426	0.874323	0.876362
India	South Asia	South Asia	0.332594	0.338592	0.344592	0.350685	0.356996	0.363419	0.370019	0.376359	0.382818	0.389454	0.395752	0.401837	0.407411	0.413116	0.419185	0.425913	0.433322	0.441351	0.449236	0.457672	0.467019	0.476833	0.487211	0.498318	0.509722	0.521243	0.53222	0.542389	0.55193	0.56081	0.568138	0.575402
Indonesia	Southeast Asia	Southeast Asia, east Asia, and Oceania	0.457135	0.466506	0.475753	0.484775	0.493607	0.502008	0.510108	0.518102	0.524046	0.529176	0.53379	0.537978	0.542246	0.54655	0.550902	0.555425	0.560266	0.565812	0.572225	0.578867	0.585982	0.593653	0.601186	0.60851	0.6155	0.622222	0.628667	0.634896	0.640949	0.646865	0.651927	0.656868
Iran	North Africa and Middle East	North Africa and Middle East	0.4538	0.468983	0.480627	0.492277	0.505073	0.517531	0.528601	0.537728	0.546366	0.555624	0.565475	0.574618	0.584097	0.593963	0.603717	0.613291	0.621268	0.627749	0.632862	0.637398	0.642559	0.647899	0.651501	0.654475	0.657962	0.662058	0.667652	0.674343	0.68091	0.686742	0.691919	0.697207
Iraq	North Africa and Middle East	North Africa and Middle East	0.412044	0.415814	0.420354	0.424835	0.428752	0.432076	0.436818	0.443104	0.452384	0.462736	0.472376	0.481458	0.488665	0.492174	0.498934	0.504719	0.510918	0.517699	0.525243	0.533201	0.542343	0.553049	0.564745	0.576969	0.588318	0.599494	0.611509	0.622675	0.633232	0.643635	0.6533	0.662626
Ireland	Western Europe	High income	0.719892	0.725195	0.731919	0.738384	0.744012	0.748922	0.75401	0.75997	0.766489	0.773539	0.780191	0.786354	0.793011	0.800006	0.806853	0.811714	0.814505	0.816931	0.819932	0.82393	0.828104	0.831805	0.835325	0.838644	0.842082	0.847438	0.852643	0.857816	0.863925	0.869413	0.871959	0.873754
Israel	Western Europe	High income	0.709178	0.713372	0.717898	0.72225	0.726655	0.731128	0.734714	0.738015	0.741927	0.745443	0.749184	0.752834	0.755988	0.758875	0.762213	0.765543	0.768734	0.770756	0.772012	0.773304	0.77526	0.77765	0.780403	0.783267	0.786151	0.788874	0.791772	0.795173	0.799125	0.803233	0.806352	0.809012
Italy	Western Europe	High income	0.706255	0.711457	0.71665	0.721721	0.726871	0.731644	0.736051	0.739972	0.743102	0.746074	0.749676	0.753555	0.757191	0.760094	0.762788	0.76569	0.768402	0.770698	0.773068	0.775499	0.778109	0.780703	0.783091	0.785357	0.787534	0.789902	0.792477	0.795311	0.798363	0.80153	0.803636	0.805774
Jamaica	Caribbean	Latin America and Caribbean	0.534781	0.539594	0.545089	0.551218	0.557644	0.564315	0.57094	0.577212	0.583048	0.588846	0.594593	0.600192	0.605592	0.610877	0.615836	0.6204	0.625019	0.629549	0.633968	0.638111	0.642129	0.646396	0.650584	0.654574	0.658505	0.662466	0.666469	0.670291	0.674075	0.677779	0.680567	0.683263
Japan	High-income Asia Pacific	High income	0.790254	0.794616	0.799156	0.802973	0.806689	0.810511	0.813871	0.816676	0.819016	0.821067	0.822939	0.824723	0.826937	0.829392	0.832037	0.834289	0.836222	0.838294	0.840301	0.842134	0.844362	0.84675	0.849061	0.851357	0.853693	0.856097	0.858698	0.861393	0.864237	0.867148	0.869107	0.871242
Jordan	North Africa and Middle East	North Africa and Middle East	0.539147	0.542819	0.547459	0.552182	0.557254	0.562572	0.56753	0.572582	0.577644	0.582759	0.587909	0.593183	0.599	0.604946	0.611934	0.619909	0.627804	0.63567	0.643893	0.652196	0.659949	0.667397	0.674569	0.68112	0.687134	0.692952	0.698473	0.703924	0.709413	0.714999	0.720068	0.725307
Kazakhstan	Central Asia	Central Europe, eastern Europe, and central Asia	0.589436	0.590968	0.596128	0.603138	0.610591	0.618574	0.626013	0.631167	0.635389	0.64018	0.64469	0.648397	0.651529	0.654836	0.658733	0.662944	0.667049	0.671367	0.676353	0.681607	0.686997	0.691759	0.695313	0.699054	0.703512	0.70823	0.712569	0.716027	0.718532	0.720798	0.722789	0.725144
Kenya	Eastern Sub-Saharan Africa	Sub-Saharan Africa	0.33385	0.340476	0.346299	0.351612	0.356779	0.361536	0.366203	0.370436	0.374581	0.37863	0.382396	0.386188	0.389886	0.39368	0.397744	0.402444	0.407746	0.413736	0.419738	0.426124	0.433306	0.440894	0.448666	0.456667	0.464724	0.473084	0.481709	0.490297	0.499101	0.508004	0.516137	0.523768
Kiribati	Oceania	Southeast Asia, east Asia, and Oceania	0.41039	0.412884	0.415578	0.418482	0.421716	0.425024	0.428301	0.431642	0.435742	0.439693	0.444436	0.448782	0.453462	0.458208	0.462336	0.466722	0.470557	0.474227	0.477202	0.480036	0.482448	0.485028	0.488176	0.491881	0.495317	0.50006	0.505208	0.510019	0.51481	0.519441	0.523454	0.527187
Kuwait	North Africa and Middle East	North Africa and Middle East	0.664518	0.66881	0.670159	0.670036	0.671393	0.677216	0.686093	0.695789	0.704384	0.711841	0.718358	0.722841	0.726817	0.731779	0.738154	0.746385	0.754928	0.762411	0.770003	0.777547	0.784874	0.791812	0.798357	0.804584	0.810743	0.816998	0.823027	0.828887	0.834371	0.839688	0.84346	0.846651
Kyrgyzstan	Central Asia	Central Europe, eastern Europe, and central Asia	0.519408	0.523747	0.527902	0.532431	0.536233	0.539053	0.541629	0.543341	0.543259	0.542867	0.543036	0.543806	0.544375	0.545649	0.547262	0.54826	0.549384	0.551146	0.553206	0.555124	0.556417	0.558923	0.561542	0.565777	0.570569	0.575463	0.580389	0.585766	0.591237	0.596502	0.6005	0.603979
Laos	Southeast Asia	Southeast Asia, east Asia, and Oceania	0.264283	0.268788	0.273435	0.27814	0.28327	0.288795	0.294838	0.301478	0.308403	0.315973	0.323947	0.33258	0.341667	0.350658	0.359682	0.368729	0.378122	0.387724	0.397011	0.406139	0.414866	0.423355	0.431149	0.438691	0.445869	0.45275	0.459584	0.466169	0.472618	0.478811	0.484193	0.489136
Latvia	Eastern Europe	Central Europe, eastern Europe, and central Asia	0.680194	0.688117	0.696157	0.70525	0.712531	0.717639	0.72114	0.723747	0.725427	0.72722	0.730951	0.736294	0.74187	0.748168	0.755263	0.761929	0.76846	0.776482	0.786325	0.794504	0.798172	0.799081	0.801026	0.80266	0.803721	0.806986	0.811464	0.816923	0.82142	0.824782	0.8279	0.830664
Lebanon	North Africa and Middle East	North Africa and Middle East	0.536719	0.539197	0.541794	0.544581	0.547684	0.551472	0.556436	0.562121	0.569059	0.576079	0.582698	0.589186	0.595979	0.602967	0.610846	0.619391	0.627791	0.636938	0.646668	0.657433	0.668805	0.680921	0.693911	0.704811	0.712424	0.718697	0.724583	0.729963	0.734746	0.738644	0.74201	0.744746
Lesotho	Southern Sub-Saharan Africa	Sub-Saharan Africa	0.339155	0.345497	0.35217	0.35878	0.365311	0.371265	0.377221	0.383097	0.388406	0.393495	0.398636	0.40399	0.409022	0.413983	0.418671	0.423211	0.427807	0.432745	0.438341	0.44358	0.448966	0.45453	0.46042	0.466692	0.473188	0.479754	0.486145	0.491978	0.497382	0.502457	0.506747	0.510393
Liberia	Western Sub-Saharan Africa	Sub-Saharan Africa	0.235297	0.238212	0.238283	0.235984	0.232657	0.228424	0.222683	0.219673	0.219054	0.222213	0.231173	0.239594	0.248312	0.251595	0.25518	0.258968	0.262897	0.26724	0.271854	0.276804	0.282236	0.288015	0.294854	0.302986	0.310955	0.318485	0.325085	0.331528	0.337785	0.343403	0.348134	0.352442
Libya	North Africa and Middle East	North Africa and Middle East	0.527998	0.541432	0.554468	0.566798	0.578651	0.589579	0.60035	0.61062	0.619974	0.628601	0.637048	0.644685	0.651669	0.659345	0.666914	0.675322	0.683702	0.691855	0.698873	0.704998	0.711362	0.711467	0.716701	0.717665	0.716042	0.713651	0.71076	0.710666	0.71272	0.716157	0.72027	0.725771
Lithuania	Eastern Europe	Central Europe, eastern Europe, and central Asia	0.668504	0.673234	0.680993	0.687481	0.691152	0.694734	0.698591	0.702841	0.707468	0.712834	0.719897	0.727134	0.733793	0.74123	0.74895	0.756352	0.763059	0.77023	0.778274	0.78569	0.793365	0.800925	0.807827	0.81322	0.817886	0.823113	0.829304	0.835872	0.841919	0.847906	0.852752	0.856484
Luxembourg	Western Europe	High income	0.781052	0.785961	0.789053	0.792844	0.797824	0.802682	0.806516	0.810235	0.813889	0.817571	0.822007	0.825313	0.828223	0.830984	0.833673	0.836675	0.840574	0.844707	0.847979	0.850689	0.853258	0.856217	0.859789	0.863369	0.866694	0.870113	0.873421	0.876348	0.878638	0.880594	0.882495	0.884429
Macedonia	Central Europe	Central Europe, eastern Europe, and central Asia	0.609026	0.611337	0.612709	0.613195	0.614363	0.616995	0.620944	0.626224	0.632059	0.636687	0.641651	0.64805	0.655399	0.663409	0.671238	0.678047	0.684044	0.689729	0.695377	0.700453	0.705589	0.710593	0.715173	0.719671	0.72409	0.728604	0.733174	0.73734	0.741334	0.745194	0.74785	0.75063
Madagascar	Eastern Sub-Saharan Africa	Sub-Saharan Africa	0.279889	0.28043	0.280501	0.280204	0.279615	0.279164	0.279066	0.279426	0.280318	0.281571	0.283191	0.285668	0.287153	0.289675	0.29263	0.295919	0.299723	0.304026	0.30899	0.313451	0.318353	0.323801	0.329948	0.336519	0.343353	0.350444	0.358026	0.366236	0.37497	0.384209	0.392779	0.400247
Malawi	Eastern Sub-Saharan Africa	Sub-Saharan Africa	0.20401	0.206044	0.206732	0.208091	0.209145	0.211756	0.215264	0.219416	0.223122	0.227068	0.230901	0.234021	0.237602	0.241559	0.246435	0.251672	0.257596	0.265227	0.27369	0.282297	0.29118	0.300449	0.309198	0.317936	0.327042	0.33614	0.344732	0.353121	0.36147	0.370115	0.377879	0.384554
Malaysia	Southeast Asia	Southeast Asia, east Asia, and Oceania	0.545799	0.551684	0.558187	0.565846	0.57438	0.583441	0.593152	0.603418	0.612645	0.621725	0.630524	0.638257	0.645044	0.650886	0.656243	0.661242	0.665956	0.670844	0.6764	0.682071	0.688259	0.694083	0.699665	0.704931	0.709954	0.71466	0.719223	0.724235	0.729388	0.734588	0.738744	0.742524
Maldives	Southeast Asia	Southeast Asia, east Asia, and Oceania	0.331602	0.344399	0.358252	0.372807	0.388082	0.403946	0.420519	0.437436	0.453973	0.469338	0.483496	0.495924	0.507405	0.518927	0.52991	0.538253	0.54795	0.557529	0.56684	0.574442	0.581981	0.589684	0.596949	0.604239	0.611578	0.618454	0.624876	0.631083	0.637206	0.643083	0.647609	0.650887
Mali	Western Sub-Saharan Africa	Sub-Saharan Africa	0.126526	0.129128	0.131537	0.134177	0.136938	0.139866	0.143079	0.146414	0.149987	0.153737	0.15719	0.161344	0.165421	0.169734	0.17378	0.17803	0.182452	0.186913	0.191537	0.196538	0.201804	0.207097	0.212465	0.217994	0.22373	0.229826	0.236186	0.242726	0.24942	0.256251	0.262629	0.26858
Malta	Western Europe	High income	0.656505	0.661113	0.666325	0.67212	0.677847	0.682618	0.686623	0.691756	0.698095	0.704735	0.711805	0.717803	0.72279	0.727511	0.731934	0.736189	0.74014	0.744238	0.748427	0.752171	0.756251	0.760311	0.764538	0.768616	0.772729	0.777277	0.781673	0.78641	0.790966	0.795198	0.798375	0.801585
Marshall Islands	Oceania	Southeast Asia, east Asia, and Oceania	0.430839	0.435571	0.440491	0.445479	0.450848	0.45686	0.461209	0.464753	0.468133	0.471293	0.474563	0.478588	0.482776	0.486249	0.489573	0.493271	0.497456	0.50225	0.50636	0.510795	0.516085	0.521177	0.526042	0.531446	0.53664	0.541793	0.546783	0.552065	0.557599	0.563429	0.568838	0.574091
Mauritania	Western Sub-Saharan Africa	Sub-Saharan Africa	0.335781	0.341135	0.346531	0.352177	0.357586	0.363038	0.368508	0.373021	0.37708	0.381112	0.384205	0.386487	0.388564	0.391105	0.394013	0.397499	0.403159	0.408377	0.413234	0.417911	0.423202	0.428867	0.434724	0.441069	0.447654	0.454523	0.46127	0.468452	0.47584	0.483768	0.491366	0.498945
Mauritius	Southeast Asia	Southeast Asia, east Asia, and Oceania	0.544587	0.548209	0.553455	0.560689	0.569092	0.577319	0.584797	0.591498	0.597363	0.602034	0.607088	0.612241	0.61719	0.622765	0.62903	0.634767	0.639545	0.644359	0.649631	0.655	0.66047	0.666498	0.673128	0.680114	0.686617	0.69224	0.697021	0.701618	0.706267	0.710935	0.71463	0.71826
Mexico	Central Latin America	Latin America and Caribbean	0.504996	0.509511	0.514638	0.520493	0.526749	0.531554	0.536531	0.541988	0.547842	0.553813	0.559533	0.564774	0.570114	0.575698	0.580985	0.585224	0.588543	0.591447	0.594455	0.596684	0.599527	0.603646	0.608914	0.61509	0.621857	0.628897	0.635925	0.642667	0.649053	0.655095	0.660119	0.664575
Moldova	Eastern Europe	Central Europe, eastern Europe, and central Asia	0.604252	0.607271	0.609665	0.614153	0.617604	0.620951	0.623114	0.62437	0.624117	0.622835	0.622005	0.622936	0.625875	0.629985	0.635395	0.641531	0.647996	0.654216	0.661047	0.666284	0.67199	0.678004	0.68298	0.688519	0.694105	0.699355	0.705145	0.711207	0.717244	0.723012	0.727711	0.732215
Mongolia	Central Asia	Central Europe, eastern Europe, and central Asia	0.46655	0.472199	0.477587	0.482727	0.488277	0.495007	0.501704	0.508558	0.514793	0.520781	0.52665	0.53262	0.538425	0.543972	0.549551	0.55468	0.559561	0.564237	0.568501	0.571342	0.574407	0.578601	0.583256	0.588081	0.592867	0.59686	0.600261	0.603722	0.607502	0.611251	0.61463	0.617622
Montenegro	Central Europe	Central Europe, eastern Europe, and central Asia	0.674226	0.674306	0.672665	0.668666	0.665012	0.662765	0.663415	0.665542	0.669025	0.672096	0.677307	0.683433	0.689939	0.696518	0.702998	0.709065	0.715459	0.722504	0.729982	0.736539	0.743348	0.75008	0.755578	0.760887	0.765777	0.770561	0.775201	0.779765	0.784409	0.789027	0.792554	0.795801
Morocco	North Africa and Middle East	North Africa and Middle East	0.358073	0.364985	0.371187	0.376779	0.382849	0.388164	0.39415	0.399504	0.405039	0.410303	0.415344	0.420595	0.425776	0.431218	0.436822	0.442531	0.448676	0.455036	0.461804	0.46893	0.47627	0.483922	0.491603	0.499529	0.507443	0.515583	0.523519	0.531611	0.53973	0.547837	0.555246	0.562698
Mozambique	Eastern Sub-Saharan Africa	Sub-Saharan Africa	0.173065	0.17555	0.177285	0.179852	0.182237	0.183428	0.185706	0.18865	0.191999	0.195435	0.198534	0.202242	0.20639	0.210534	0.214972	0.219692	0.224758	0.230158	0.23579	0.241361	0.246752	0.252232	0.258316	0.26528	0.272893	0.281033	0.289152	0.297165	0.305227	0.313175	0.320291	0.326463
Myanmar	Southeast Asia	Southeast Asia, east Asia, and Oceania	0.31922	0.322035	0.325629	0.329707	0.33429	0.339591	0.345192	0.350893	0.356697	0.363038	0.37036	0.378172	0.386344	0.395219	0.404692	0.414662	0.424705	0.434537	0.443596	0.451955	0.46018	0.467851	0.475336	0.482822	0.490255	0.497374	0.504116	0.510823	0.517557	0.524109	0.529435	0.533901
Namibia	Southern Sub-Saharan Africa	Sub-Saharan Africa	0.45004	0.454534	0.460021	0.465734	0.471873	0.477794	0.483116	0.488013	0.492813	0.497614	0.502407	0.506719	0.510818	0.514575	0.519104	0.523882	0.52935	0.535062	0.540897	0.546516	0.552742	0.559619	0.566979	0.57459	0.582321	0.589821	0.596283	0.601755	0.606618	0.610921	0.614436	0.617565
Nepal	South Asia	South Asia	0.199561	0.205687	0.212113	0.218843	0.226073	0.233253	0.240701	0.248383	0.256227	0.264359	0.272719	0.281287	0.289514	0.297773	0.306197	0.314662	0.323056	0.331446	0.340151	0.348702	0.356868	0.364643	0.372438	0.380022	0.387689	0.395021	0.401629	0.408464	0.415237	0.422007	0.427417	0.433175
Netherlands	Western Europe	High income	0.794612	0.799285	0.803966	0.808279	0.81253	0.816663	0.819984	0.822882	0.825882	0.828694	0.831914	0.835518	0.838676	0.841639	0.844807	0.847934	0.850799	0.853595	0.856368	0.8586	0.861255	0.864247	0.866951	0.869403	0.871849	0.874403	0.876784	0.8793	0.8819	0.884644	0.886559	0.888464
New Zealand	Australasia	High income	0.752322	0.755616	0.759461	0.763635	0.767119	0.769998	0.773575	0.778206	0.781731	0.784429	0.78766	0.791426	0.79452	0.796287	0.798177	0.799107	0.798457	0.798448	0.79967	0.801728	0.805133	0.80976	0.814958	0.820146	0.823909	0.827462	0.831844	0.836302	0.840598	0.844533	0.847399	0.849442
Nicaragua	Central Latin America	Latin America and Caribbean	0.346035	0.351741	0.357713	0.363562	0.369728	0.376625	0.384087	0.391776	0.399808	0.408086	0.416108	0.42379	0.430814	0.437248	0.443275	0.448845	0.45395	0.459043	0.463838	0.467962	0.472172	0.476593	0.481297	0.486105	0.491207	0.496392	0.501853	0.507482	0.512338	0.516597	0.520293	0.523958
Niger	Western Sub-Saharan Africa	Sub-Saharan Africa	0.0808685	0.0828482	0.0847716	0.0866965	0.0886087	0.0904737	0.0923464	0.0942191	0.0965452	0.0988137	0.100887	0.103272	0.105741	0.108323	0.110764	0.113452	0.116247	0.118972	0.121958	0.124829	0.127953	0.130958	0.13447	0.137978	0.141732	0.145441	0.1492	0.152959	0.156875	0.160889	0.164539	0.168073
Nigeria	Western Sub-Saharan Africa	Sub-Saharan Africa	0.305868	0.308489	0.311234	0.313983	0.316747	0.319637	0.323138	0.326691	0.330264	0.333937	0.338202	0.34303	0.349093	0.355911	0.363781	0.372584	0.381026	0.38978	0.398038	0.406353	0.414998	0.423352	0.43178	0.440125	0.448767	0.457241	0.465184	0.472973	0.480844	0.488787	0.496205	0.503391
North Korea	East Asia	Southeast Asia, east Asia, and Oceania	0.49778	0.499121	0.49963	0.499701	0.499531	0.499081	0.498429	0.497137	0.496159	0.496485	0.497462	0.499674	0.502634	0.506165	0.510229	0.515098	0.519741	0.524067	0.528813	0.533114	0.537193	0.541212	0.545332	0.549483	0.553604	0.557321	0.560744	0.563388	0.565161	0.566766	0.568189	0.569855
Northern Mariana Islands	Oceania	Southeast Asia, east Asia, and Oceania	0.708594	0.712224	0.715788	0.719179	0.72251	0.726219	0.730074	0.733795	0.737423	0.740935	0.744493	0.747171	0.748755	0.750172	0.751529	0.751827	0.751798	0.751608	0.750807	0.748597	0.746617	0.744412	0.742937	0.742284	0.742605	0.743797	0.748455	0.756495	0.761255	0.765771	0.769428	0.771535
Norway	Western Europe	High income	0.795887	0.800469	0.805437	0.810566	0.815415	0.820224	0.825702	0.831469	0.836563	0.84113	0.846475	0.852112	0.856758	0.860303	0.863469	0.866217	0.868588	0.87093	0.873745	0.876583	0.880378	0.884352	0.88816	0.89199	0.8955	0.898913	0.902584	0.906044	0.909262	0.912279	0.91453	0.916133
Oman	North Africa and Middle East	North Africa and Middle East	0.429271	0.442268	0.457738	0.474999	0.493513	0.513194	0.533246	0.554316	0.574475	0.592398	0.608422	0.622161	0.635162	0.647249	0.657626	0.666401	0.675354	0.685056	0.694952	0.703099	0.710689	0.718265	0.72645	0.733432	0.738744	0.743597	0.748797	0.753786	0.75918	0.764528	0.768854	0.773392
Pakistan	South Asia	South Asia	0.310468	0.316266	0.322248	0.328219	0.334433	0.340926	0.347656	0.354219	0.360875	0.367641	0.374319	0.380594	0.38663	0.392719	0.399084	0.405667	0.412235	0.41852	0.424348	0.43002	0.435641	0.441456	0.447097	0.452823	0.458781	0.464793	0.471022	0.477544	0.484326	0.491023	0.497364	0.504029
Palestine	North Africa and Middle East	North Africa and Middle East	0.401792	0.405727	0.411147	0.41678	0.423137	0.429307	0.434731	0.440902	0.447782	0.45491	0.460681	0.465299	0.4686	0.472882	0.478527	0.485321	0.49189	0.498978	0.506849	0.515816	0.525712	0.536778	0.548295	0.559163	0.56924	0.579204	0.589493	0.599157	0.608125	0.616467	0.62381	0.631012
Panama	Central Latin America	Latin America and Caribbean	0.546048	0.550484	0.554973	0.559169	0.561715	0.563353	0.56531	0.569396	0.574697	0.580433	0.587378	0.594536	0.600139	0.604043	0.606877	0.609494	0.61225	0.615285	0.618959	0.622403	0.625116	0.628634	0.634263	0.641324	0.649108	0.657962	0.667277	0.676784	0.68672	0.696671	0.703788	0.708865
Papua New Guinea	Oceania	Southeast Asia, east Asia, and Oceania	0.310669	0.314967	0.31953	0.325006	0.330664	0.335421	0.340349	0.344258	0.347801	0.351251	0.354136	0.356589	0.358572	0.360737	0.362828	0.365295	0.367827	0.370794	0.373426	0.376528	0.380287	0.383588	0.386781	0.389926	0.394005	0.398286	0.402407	0.406153	0.409165	0.412311	0.415187	0.417797
Paraguay	Tropical Latin America	Latin America and Caribbean	0.469528	0.474352	0.479314	0.484614	0.490227	0.496337	0.502323	0.508287	0.51382	0.518721	0.523008	0.526917	0.531177	0.53536	0.539557	0.543623	0.547943	0.552759	0.558017	0.5629	0.568847	0.574954	0.58065	0.587247	0.593953	0.600484	0.607018	0.613582	0.620032	0.62607	0.631058	0.635718
Peru	Andean Latin America	Latin America and Caribbean	0.51042	0.512162	0.513822	0.515982	0.519306	0.523641	0.528312	0.533576	0.538722	0.543853	0.548952	0.553775	0.558853	0.563871	0.569063	0.574517	0.580503	0.586958	0.593751	0.599955	0.606521	0.613051	0.619355	0.625519	0.631114	0.636278	0.641285	0.646181	0.650977	0.655434	0.658672	0.662054
Philippines	Southeast Asia	Southeast Asia, east Asia, and Oceania	0.510012	0.513707	0.51711	0.5206	0.524614	0.528828	0.532939	0.53659	0.539496	0.542258	0.544998	0.547409	0.549521	0.551568	0.553704	0.555664	0.557976	0.560822	0.563975	0.567356	0.571766	0.57724	0.583768	0.590838	0.598385	0.606216	0.614225	0.622315	0.630464	0.638547	0.644867	0.651219
Poland	Central Europe	Central Europe, eastern Europe, and central Asia	0.627228	0.632671	0.640662	0.64895	0.658011	0.666679	0.674379	0.682588	0.690806	0.698536	0.706662	0.714831	0.722009	0.728155	0.733673	0.738429	0.742364	0.746009	0.750521	0.756427	0.763185	0.769407	0.774681	0.779434	0.783682	0.787445	0.790651	0.79453	0.799479	0.804791	0.808795	0.812043
Portugal	Western Europe	High income	0.599778	0.607269	0.614808	0.622101	0.629306	0.635499	0.640865	0.646193	0.651336	0.656121	0.661611	0.667247	0.672584	0.677663	0.682353	0.686887	0.691159	0.694975	0.698605	0.702223	0.706564	0.711263	0.715804	0.719837	0.723021	0.725756	0.728301	0.731226	0.734403	0.73809	0.741037	0.744152
Principality of Monaco	Western Europe	High income	0.845495	0.848304	0.850864	0.853265	0.855627	0.857986	0.860245	0.862447	0.864717	0.866842	0.868974	0.871095	0.873183	0.875198	0.877232	0.879288	0.881274	0.883262	0.885331	0.887328	0.889263	0.891238	0.893074	0.894864	0.896548	0.898356	0.900051	0.901753	0.903389	0.905031	0.906685	0.908263
Puerto Rico	Caribbean	Latin America and Caribbean	0.658758	0.663262	0.667272	0.671024	0.675451	0.680674	0.685866	0.691274	0.69704	0.702851	0.710036	0.718956	0.725957	0.730475	0.73422	0.737742	0.741629	0.745884	0.750922	0.756362	0.761763	0.766785	0.772312	0.778461	0.78512	0.7918	0.799084	0.806649	0.812906	0.818843	0.822918	0.825526
Qatar	North Africa and Middle East	North Africa and Middle East	0.651208	0.655339	0.660674	0.666194	0.672025	0.67832	0.684836	0.69311	0.701409	0.708881	0.714832	0.720831	0.727112	0.733537	0.740223	0.747189	0.754123	0.76096	0.767659	0.774277	0.780807	0.787212	0.793495	0.799612	0.805726	0.811873	0.81798	0.824017	0.829962	0.835805	0.841467	0.846861
Republic of Nauru	Oceania	Southeast Asia, east Asia, and Oceania	0.539146	0.538434	0.537039	0.53506	0.533001	0.530891	0.528544	0.526242	0.523885	0.521894	0.520255	0.519235	0.518439	0.51846	0.51881	0.519893	0.522673	0.523201	0.526084	0.530221	0.53569	0.542343	0.549891	0.560113	0.571424	0.581283	0.590103	0.597619	0.605312	0.612697	0.61933	0.625178
Republic of Niue	Oceania	Southeast Asia, east Asia, and Oceania	0.587533	0.593882	0.599881	0.605515	0.61065	0.615375	0.619735	0.623914	0.627579	0.630857	0.634069	0.637367	0.641122	0.64578	0.650615	0.657281	0.664163	0.670199	0.676397	0.682579	0.686281	0.690316	0.694151	0.697221	0.700546	0.704233	0.707476	0.711221	0.715108	0.719079	0.72279	0.726222
Republic of Palau	Oceania	Southeast Asia, east Asia, and Oceania	0.66291	0.668231	0.673302	0.676649	0.680196	0.684832	0.690096	0.695122	0.699653	0.703115	0.705197	0.707402	0.709588	0.711	0.712544	0.71434	0.716353	0.71881	0.720807	0.722288	0.724066	0.726733	0.729613	0.731953	0.734768	0.738166	0.741362	0.744225	0.747761	0.750715	0.752781	0.754047
Republic of San Marino	Western Europe	High income	0.813245	0.818283	0.822783	0.827382	0.831971	0.836763	0.841389	0.845865	0.850475	0.855339	0.859695	0.863748	0.865681	0.867522	0.869287	0.87098	0.872652	0.874307	0.875992	0.877705	0.879441	0.881198	0.882925	0.884593	0.885354	0.884693	0.884478	0.884558	0.885134	0.886201	0.886868	0.888005
Romania	Central Europe	Central Europe, eastern Europe, and central Asia	0.619299	0.626796	0.630475	0.633801	0.638372	0.643719	0.648104	0.651226	0.654928	0.659545	0.665294	0.67202	0.678297	0.684075	0.690417	0.694999	0.699491	0.704524	0.710757	0.717445	0.723891	0.729018	0.733892	0.73788	0.740395	0.743474	0.747059	0.751117	0.755533	0.760284	0.764276	0.768454
Russian Federation	Eastern Europe	Central Europe, eastern Europe, and central Asia	0.671601	0.680099	0.688068	0.692036	0.694145	0.697854	0.701468	0.703753	0.705199	0.706864	0.708644	0.71057	0.713461	0.718875	0.726305	0.733593	0.740065	0.746192	0.752623	0.75796	0.76332	0.767634	0.77192	0.776527	0.780618	0.784914	0.79033	0.795669	0.800108	0.803658	0.806011	0.808536
Rwanda	Eastern Sub-Saharan Africa	Sub-Saharan Africa	0.275097	0.276195	0.277178	0.27698	0.272331	0.271102	0.271098	0.272456	0.274583	0.277014	0.280983	0.286082	0.292955	0.299677	0.306944	0.31422	0.321999	0.329617	0.337039	0.344495	0.351659	0.35894	0.366412	0.37377	0.381533	0.389895	0.398288	0.406411	0.414658	0.423087	0.429897	0.435589
Saint Kitts and Nevis	Caribbean	Latin America and Caribbean	0.580686	0.590255	0.599187	0.607236	0.614515	0.620716	0.626207	0.631275	0.63554	0.639714	0.644353	0.649227	0.654593	0.659925	0.667568	0.679145	0.690079	0.697728	0.704141	0.709499	0.71446	0.719324	0.723436	0.726707	0.72953	0.732221	0.735566	0.739471	0.743736	0.748152	0.751568	0.754987
Saint Lucia	Caribbean	Latin America and Caribbean	0.496297	0.505976	0.515368	0.524235	0.532731	0.54148	0.550242	0.558293	0.566139	0.573429	0.579789	0.585088	0.590168	0.595675	0.601625	0.60724	0.612755	0.617995	0.623273	0.62817	0.632783	0.637439	0.641567	0.645153	0.648744	0.652157	0.655653	0.659341	0.663087	0.66684	0.66972	0.67251
Saint Vincent and the Grenadines	Caribbean	Latin America and Caribbean	0.47593	0.481076	0.485978	0.490999	0.496379	0.502986	0.509527	0.515483	0.52121	0.5271	0.533173	0.539456	0.546064	0.552694	0.558664	0.563588	0.568222	0.572819	0.577611	0.582549	0.58719	0.590259	0.592154	0.594614	0.598379	0.603754	0.610059	0.616438	0.622635	0.628326	0.632861	0.637196
Samoa	Oceania	Southeast Asia, east Asia, and Oceania	0.487491	0.490987	0.494027	0.497079	0.499485	0.50237	0.505778	0.509096	0.512368	0.515409	0.518902	0.522972	0.527243	0.531604	0.536003	0.540558	0.544812	0.549111	0.553165	0.556474	0.559623	0.562892	0.56532	0.567449	0.569494	0.571999	0.575402	0.578925	0.582321	0.586257	0.590075	0.593393
Sao Tome and Principe	Western Sub-Saharan Africa	Sub-Saharan Africa	0.309543	0.310601	0.311515	0.312744	0.314261	0.315844	0.317729	0.319796	0.322519	0.325652	0.32946	0.334485	0.340303	0.346852	0.353722	0.361106	0.369413	0.377814	0.386689	0.395821	0.405531	0.415784	0.425721	0.435592	0.445146	0.454051	0.46323	0.472171	0.481098	0.489838	0.497861	0.505414
Saudi Arabia	North Africa and Middle East	North Africa and Middle East	0.538955	0.549908	0.561144	0.572187	0.582879	0.593251	0.603648	0.613749	0.623518	0.632796	0.642312	0.651502	0.660357	0.66984	0.679918	0.690521	0.701153	0.711442	0.72196	0.731158	0.740301	0.749959	0.759055	0.767388	0.775178	0.782301	0.788868	0.794886	0.800657	0.806088	0.810542	0.815143
Senegal	Western Sub-Saharan Africa	Sub-Saharan Africa	0.238048	0.244482	0.250417	0.255768	0.26038	0.264439	0.268319	0.272073	0.275996	0.280112	0.283785	0.287452	0.291046	0.294887	0.298985	0.303257	0.307634	0.31257	0.317894	0.323658	0.329804	0.33606	0.342977	0.350134	0.357182	0.364144	0.371115	0.378351	0.38608	0.394012	0.401198	0.408054
Serbia	Central Europe	Central Europe, eastern Europe, and central Asia	0.630511	0.638017	0.641972	0.642096	0.642223	0.64274	0.644846	0.647162	0.650246	0.655534	0.660753	0.665407	0.671511	0.678335	0.68682	0.696098	0.704945	0.713242	0.721505	0.729966	0.740091	0.750073	0.757105	0.762171	0.766043	0.769842	0.773654	0.77746	0.781495	0.785768	0.789183	0.792416
Seychelles	Southeast Asia	Southeast Asia, east Asia, and Oceania	0.575526	0.582698	0.590053	0.598044	0.606041	0.613853	0.622135	0.630698	0.638439	0.64534	0.651552	0.656491	0.660908	0.664162	0.666461	0.669265	0.67215	0.675077	0.676591	0.677847	0.680164	0.683681	0.687629	0.692526	0.697115	0.701723	0.706184	0.711027	0.716408	0.722074	0.726664	0.730151
Sierra Leone	Western Sub-Saharan Africa	Sub-Saharan Africa	0.211569	0.213014	0.214223	0.216089	0.218277	0.219823	0.219969	0.21909	0.218584	0.217943	0.218493	0.220391	0.224586	0.229236	0.234132	0.23955	0.245648	0.252523	0.259782	0.267058	0.27427	0.281674	0.290339	0.300737	0.310349	0.316999	0.324092	0.331213	0.338342	0.34577	0.352412	0.358666
Singapore	High-income Asia Pacific	High income	0.686404	0.695056	0.703428	0.712315	0.721257	0.729982	0.739028	0.747572	0.754873	0.760831	0.767717	0.774295	0.779736	0.784166	0.789853	0.796456	0.803343	0.810625	0.818124	0.824252	0.830222	0.83383	0.837392	0.84042	0.842895	0.845402	0.847597	0.849052	0.850763	0.852497	0.854296	0.856098
Slovakia	Central Europe	Central Europe, eastern Europe, and central Asia	0.653854	0.658731	0.66583	0.675968	0.688136	0.697477	0.704405	0.711513	0.719059	0.726144	0.734046	0.741393	0.746791	0.751167	0.755837	0.761724	0.767673	0.772914	0.777197	0.781052	0.786254	0.791465	0.795456	0.797904	0.799619	0.800394	0.800878	0.802277	0.804357	0.806448	0.808306	0.810611
Slovenia	Central Europe	Central Europe, eastern Europe, and central Asia	0.727464	0.732667	0.737392	0.741774	0.746235	0.750995	0.756349	0.762275	0.767729	0.773236	0.779578	0.786241	0.791806	0.796372	0.800962	0.805601	0.809709	0.813006	0.816347	0.818879	0.821178	0.823024	0.824337	0.825826	0.827799	0.829837	0.831368	0.833038	0.835472	0.838267	0.840374	0.842431
Solomon Islands	Oceania	Southeast Asia, east Asia, and Oceania	0.301217	0.305831	0.311432	0.317151	0.3233	0.329969	0.336208	0.341836	0.347135	0.351867	0.354799	0.356627	0.35791	0.359424	0.361291	0.36358	0.366444	0.369828	0.373765	0.377821	0.382718	0.388055	0.393005	0.397906	0.402245	0.406234	0.410407	0.414676	0.418889	0.422736	0.426112	0.42936
Somalia	Eastern Sub-Saharan Africa	Sub-Saharan Africa	0.0488486	0.0494224	0.0501155	0.050798	0.0514717	0.0521486	0.0528405	0.053571	0.0543215	0.0550718	0.0558421	0.0566432	0.0574576	0.0582722	0.0590769	0.0598985	0.0607415	0.0615982	0.0624754	0.0633822	0.0643221	0.0653068	0.0663549	0.0674595	0.0686093	0.0698115	0.071064	0.0723348	0.0736422	0.0749798	0.0763634	0.0776881
South Africa	Southern Sub-Saharan Africa	Sub-Saharan Africa	0.541571	0.546921	0.552067	0.557198	0.562449	0.567905	0.573454	0.579099	0.584437	0.589407	0.594094	0.597884	0.600922	0.603516	0.606263	0.60999	0.615015	0.620608	0.625948	0.630646	0.635269	0.639992	0.644716	0.649431	0.653964	0.658418	0.662642	0.666623	0.670335	0.674041	0.677166	0.679627
South Korea	High-income Asia Pacific	High income	0.692329	0.702631	0.712441	0.722287	0.732198	0.74194	0.751553	0.760592	0.768282	0.776773	0.785429	0.793496	0.801024	0.807688	0.813721	0.819093	0.82418	0.829128	0.833895	0.838108	0.842511	0.846913	0.85114	0.855441	0.859666	0.863907	0.868318	0.872618	0.876823	0.880732	0.883718	0.886675
South Sudan	Eastern Sub-Saharan Africa	Sub-Saharan Africa	0.206656	0.208933	0.211199	0.213416	0.215612	0.21792	0.220399	0.223037	0.225789	0.228649	0.23173	0.235014	0.238341	0.241797	0.245462	0.249281	0.253301	0.257492	0.26174	0.266179	0.270573	0.274719	0.275066	0.275814	0.276311	0.275834	0.274455	0.274388	0.274988	0.275706	0.276788	0.278371
Spain	Western Europe	High income	0.636673	0.644131	0.651598	0.658638	0.665322	0.671576	0.677089	0.682429	0.687491	0.692245	0.697056	0.701726	0.70631	0.710679	0.714886	0.718717	0.72197	0.725211	0.729411	0.733956	0.738352	0.742096	0.745182	0.747652	0.749801	0.75227	0.754758	0.757663	0.76066	0.763943	0.766506	0.769284
Sri Lanka	Southeast Asia	Southeast Asia, east Asia, and Oceania	0.522623	0.528239	0.533346	0.538891	0.545125	0.551744	0.558939	0.566128	0.572326	0.57763	0.582943	0.587557	0.592359	0.59741	0.60225	0.606907	0.611807	0.616979	0.622414	0.62815	0.634263	0.6408	0.64805	0.655436	0.662782	0.66976	0.676277	0.682405	0.688126	0.693516	0.697649	0.701535
Sudan	North Africa and Middle East	North Africa and Middle East	0.292179	0.296473	0.300864	0.305409	0.310096	0.315208	0.32068	0.326761	0.333088	0.339755	0.346876	0.354216	0.361728	0.369694	0.377921	0.386686	0.396151	0.40608	0.416088	0.425976	0.436171	0.447239	0.45679	0.466436	0.476362	0.486549	0.496848	0.506884	0.516214	0.525009	0.533455	0.54195
Suriname	Caribbean	Latin America and Caribbean	0.502054	0.506656	0.51096	0.514419	0.51765	0.521003	0.525059	0.529751	0.5346	0.538933	0.54366	0.548684	0.553879	0.559418	0.56511	0.570462	0.575647	0.580655	0.585645	0.590513	0.59547	0.600356	0.604742	0.608911	0.612704	0.616097	0.618868	0.621684	0.624708	0.627897	0.630684	0.633666
Swaziland	Southern Sub-Saharan Africa	Sub-Saharan Africa	0.399421	0.40827	0.416683	0.424803	0.432503	0.440127	0.447399	0.45409	0.460137	0.465991	0.471853	0.477233	0.482474	0.487609	0.492669	0.498044	0.503658	0.50926	0.514731	0.520427	0.526246	0.531914	0.537798	0.543836	0.549614	0.555374	0.561061	0.566698	0.572155	0.577206	0.581653	0.58546
Sweden	Western Europe	High income	0.785536	0.790096	0.795431	0.80101	0.8067	0.812245	0.817227	0.821694	0.825732	0.829487	0.833028	0.835956	0.838742	0.841663	0.844507	0.846876	0.849116	0.851421	0.853706	0.855703	0.858728	0.861892	0.864707	0.867384	0.869923	0.872389	0.874662	0.877121	0.879889	0.882984	0.885062	0.88688
Switzerland	Western Europe	High income	0.862767	0.864797	0.867736	0.870864	0.873141	0.874835	0.876641	0.878486	0.880035	0.882046	0.885244	0.888446	0.890903	0.892781	0.89491	0.897273	0.899962	0.902913	0.905778	0.90805	0.910531	0.913277	0.915715	0.917955	0.919994	0.921833	0.923931	0.926202	0.928551	0.930682	0.932028	0.933059
Syria	North Africa and Middle East	North Africa and Middle East	0.430493	0.437907	0.445904	0.454148	0.462437	0.470692	0.478743	0.486232	0.493708	0.500475	0.507144	0.51385	0.52131	0.528936	0.538084	0.54975	0.560485	0.570028	0.57899	0.587789	0.595968	0.601524	0.602873	0.60241	0.602236	0.602283	0.602911	0.604896	0.608507	0.613337	0.617728	0.623004
Taiwan (Province of China)	East Asia	Southeast Asia, east Asia, and Oceania	0.667634	0.676537	0.684804	0.692924	0.701079	0.709627	0.719128	0.729145	0.738126	0.745338	0.752927	0.76083	0.769009	0.776956	0.784678	0.792445	0.800175	0.808138	0.815401	0.821432	0.827227	0.832064	0.836678	0.84128	0.845696	0.850055	0.854466	0.858888	0.863158	0.867412	0.871248	0.874747
Tajikistan	Central Asia	Central Europe, eastern Europe, and central Asia	0.466155	0.472342	0.475745	0.478239	0.478726	0.477587	0.474346	0.470275	0.465342	0.460506	0.457061	0.456257	0.458808	0.46333	0.469154	0.474638	0.479652	0.484211	0.488441	0.492064	0.495894	0.49987	0.503954	0.507971	0.51199	0.515783	0.519897	0.524493	0.529154	0.53377	0.537691	0.541511
Tanzania	Eastern Sub-Saharan Africa	Sub-Saharan Africa	0.259306	0.262416	0.264989	0.267255	0.269417	0.272078	0.275508	0.279259	0.283153	0.287382	0.291827	0.296716	0.301984	0.307615	0.313773	0.320437	0.327234	0.334313	0.341353	0.348378	0.355568	0.363036	0.370412	0.377963	0.385975	0.394278	0.402879	0.411825	0.420985	0.430225	0.438747	0.446568
Thailand	Southeast Asia	Southeast Asia, east Asia, and Oceania	0.506645	0.515911	0.525162	0.534304	0.543326	0.552452	0.561302	0.568449	0.573818	0.578854	0.583501	0.587662	0.591759	0.596049	0.600521	0.605041	0.610357	0.616369	0.621068	0.624329	0.628589	0.633227	0.638411	0.643673	0.648772	0.654016	0.659369	0.664804	0.670226	0.675274	0.67912	0.682548
The Bahamas	Caribbean	Latin America and Caribbean	0.693509	0.689127	0.687344	0.693817	0.70682	0.719382	0.728479	0.734781	0.739281	0.741623	0.742518	0.743593	0.74625	0.749917	0.75376	0.756783	0.759186	0.761991	0.765591	0.769562	0.77412	0.778282	0.781839	0.784624	0.787253	0.789956	0.792739	0.795347	0.798179	0.801033	0.802948	0.805021
The Gambia	Western Sub-Saharan Africa	Sub-Saharan Africa	0.238715	0.24501	0.251088	0.256996	0.262425	0.267697	0.27295	0.278274	0.283946	0.290071	0.296354	0.302543	0.307713	0.312931	0.318615	0.323568	0.328151	0.33264	0.337315	0.34239	0.347998	0.352869	0.358374	0.364256	0.369901	0.37584	0.381569	0.387274	0.393156	0.39919	0.404524	0.409714
Timor-Leste	Southeast Asia	Southeast Asia, east Asia, and Oceania	0.262468	0.270943	0.279917	0.289267	0.298763	0.308019	0.317589	0.326705	0.334894	0.339252	0.343794	0.34949	0.354162	0.35844	0.362688	0.366914	0.370654	0.375391	0.381228	0.387945	0.394887	0.401872	0.40891	0.415218	0.421156	0.426384	0.431207	0.43452	0.437019	0.440196	0.442349	0.444668
Togo	Western Sub-Saharan Africa	Sub-Saharan Africa	0.269692	0.274531	0.278789	0.281225	0.284653	0.288537	0.292607	0.296948	0.300022	0.30302	0.305473	0.307828	0.31047	0.313792	0.316688	0.319026	0.321659	0.324382	0.327743	0.331559	0.3359	0.340777	0.34632	0.352279	0.358661	0.3656	0.37291	0.380336	0.387921	0.395667	0.402357	0.408534
Tokelau	Oceania	Southeast Asia, east Asia, and Oceania	0.521942	0.526628	0.531308	0.535935	0.540524	0.545296	0.550283	0.555631	0.561048	0.566415	0.571814	0.576916	0.581858	0.586854	0.592342	0.598176	0.604429	0.611163	0.61794	0.62407	0.630176	0.636017	0.641612	0.647966	0.653232	0.658799	0.663974	0.669054	0.67418	0.679248	0.682937	0.686426
Tonga	Oceania	Southeast Asia, east Asia, and Oceania	0.491807	0.498166	0.50366	0.508904	0.514208	0.520215	0.525808	0.531009	0.536172	0.541317	0.546303	0.551054	0.556008	0.560736	0.564806	0.568449	0.57162	0.574352	0.577305	0.579171	0.580657	0.582657	0.584771	0.587351	0.590827	0.594966	0.600344	0.606244	0.611954	0.617324	0.622104	0.62635
Trinidad and Tobago	Caribbean	Latin America and Caribbean	0.62397	0.628759	0.63404	0.639192	0.644243	0.64922	0.654169	0.659294	0.664508	0.670245	0.676684	0.682763	0.688872	0.695828	0.702611	0.708521	0.7146	0.720196	0.725721	0.729539	0.733237	0.736802	0.739999	0.743594	0.747339	0.751511	0.754953	0.758227	0.761242	0.76417	0.766422	0.768763
Tunisia	North Africa and Middle East	North Africa and Middle East	0.471139	0.479543	0.488285	0.496852	0.505565	0.514197	0.523294	0.532064	0.540498	0.548725	0.556673	0.564421	0.57172	0.578883	0.586033	0.592938	0.599759	0.606697	0.613529	0.620107	0.626433	0.63202	0.637578	0.643009	0.648297	0.653414	0.658354	0.663223	0.668219	0.673171	0.677615	0.682432
Turkey	North Africa and Middle East	North Africa and Middle East	0.866281	0.870779	0.875074	0.878658	0.881895	0.885105	0.887854	0.890257	0.892409	0.894271	0.896012	0.897695	0.899485	0.901255	0.903008	0.90452	0.90586	0.907249	0.908795	0.910613	0.912389	0.914245	0.915901	0.917402	0.918883	0.920276	0.92172	0.923101	0.924572	0.926066	0.927461	0.92881
Turkmenistan	Central Asia	Central Europe, eastern Europe, and central Asia	0.563127	0.564939	0.565588	0.567174	0.567289	0.567199	0.567061	0.565623	0.564405	0.564716	0.567421	0.571044	0.575596	0.58082	0.586712	0.593389	0.599896	0.606042	0.611923	0.617653	0.623235	0.629234	0.635263	0.641362	0.647542	0.653353	0.658946	0.664285	0.669434	0.674304	0.678298	0.682161
Tuvalu	Oceania	Southeast Asia, east Asia, and Oceania	0.406248	0.41482	0.422902	0.430518	0.438563	0.444962	0.449805	0.455368	0.462455	0.468846	0.474957	0.480851	0.487252	0.492755	0.497692	0.501851	0.505975	0.510504	0.515612	0.519871	0.523456	0.527744	0.531203	0.535166	0.539122	0.544048	0.549174	0.554466	0.559859	0.566045	0.571666	0.576621
Uganda	Eastern Sub-Saharan Africa	Sub-Saharan Africa	0.187001	0.188924	0.191003	0.193557	0.197293	0.201835	0.207081	0.213092	0.219712	0.226917	0.234323	0.242186	0.250552	0.259165	0.268005	0.277369	0.287031	0.29674	0.306749	0.316731	0.326544	0.336218	0.345365	0.354382	0.363431	0.372538	0.381312	0.390082	0.399118	0.408432	0.416846	0.423261
Ukraine	Eastern Europe	Central Europe, eastern Europe, and central Asia	0.647461	0.65195	0.6576	0.662867	0.665506	0.66695	0.668105	0.669208	0.670322	0.670643	0.671095	0.672468	0.674543	0.678615	0.685381	0.692023	0.698093	0.704202	0.71098	0.716185	0.72102	0.724892	0.728817	0.734034	0.739884	0.743791	0.746858	0.750593	0.754452	0.75798	0.75993	0.760774
United Arab Emirates	North Africa and Middle East	North Africa and Middle East	0.644412	0.66074	0.675926	0.689464	0.701657	0.713138	0.724182	0.734723	0.744477	0.753254	0.760969	0.767859	0.774346	0.781144	0.788526	0.796428	0.805537	0.814871	0.822793	0.828304	0.831284	0.832913	0.833586	0.833804	0.833859	0.834175	0.835221	0.837214	0.8399	0.842985	0.846152	0.849318
United Kingdom	Western Europe	High income	0.744334	0.749148	0.754557	0.760154	0.765165	0.768657	0.771576	0.77505	0.779057	0.784036	0.789219	0.793513	0.796656	0.799186	0.801951	0.804489	0.806817	0.809353	0.812039	0.814794	0.818034	0.821719	0.826454	0.831509	0.835517	0.838952	0.84246	0.846264	0.84997	0.854131	0.85692	0.859
United States	High-income North America	High income	0.763648	0.766044	0.769595	0.773104	0.776369	0.77941	0.781935	0.783979	0.786076	0.788545	0.792317	0.796677	0.800403	0.803228	0.805305	0.806033	0.806784	0.809688	0.814577	0.820295	0.825885	0.830266	0.833958	0.837413	0.840747	0.84437	0.848016	0.85163	0.855049	0.858578	0.860793	0.862448
Uruguay	Southern Latin America	Latin America and Caribbean	0.581922	0.586156	0.589822	0.592295	0.595188	0.596825	0.599775	0.605665	0.612701	0.619009	0.623208	0.625796	0.628286	0.631438	0.634217	0.636976	0.640591	0.646332	0.653526	0.660321	0.666099	0.66708	0.665802	0.668228	0.673334	0.680596	0.689817	0.699189	0.706905	0.712537	0.71617	0.719283
Uzbekistan	Central Asia	Central Europe, eastern Europe, and central Asia	0.500242	0.501545	0.502905	0.506557	0.511019	0.516986	0.524393	0.532686	0.541279	0.549739	0.557522	0.564803	0.57169	0.578007	0.583943	0.589531	0.594498	0.599628	0.604889	0.610352	0.616098	0.621345	0.626202	0.630796	0.635257	0.639806	0.644231	0.648119	0.651918	0.655837	0.659124	0.662622
Vanuatu	Oceania	Southeast Asia, east Asia, and Oceania	0.3531	0.357005	0.360893	0.364444	0.368501	0.372479	0.376461	0.380667	0.38469	0.388301	0.392158	0.395325	0.397724	0.400396	0.403226	0.406489	0.410502	0.414916	0.419853	0.424855	0.429658	0.434283	0.438662	0.44272	0.446687	0.45033	0.454073	0.458017	0.46208	0.466276	0.470038	0.473101
Venezuela	Central Latin America	Latin America and Caribbean	0.516891	0.522272	0.529518	0.53628	0.541866	0.546348	0.548649	0.552364	0.557243	0.560278	0.563506	0.565458	0.562604	0.555212	0.550972	0.553942	0.563334	0.575367	0.586185	0.593288	0.599128	0.604823	0.610187	0.614441	0.614687	0.610675	0.606993	0.60516	0.604068	0.602314	0.600035	0.596513
Vietnam	Southeast Asia	Southeast Asia, east Asia, and Oceania	0.40763	0.413217	0.419782	0.427072	0.435106	0.443859	0.453102	0.462854	0.472479	0.481446	0.489802	0.49763	0.505453	0.513368	0.521229	0.528956	0.536301	0.543343	0.550127	0.556456	0.562769	0.568945	0.575079	0.581029	0.586914	0.59285	0.598849	0.605019	0.611351	0.617734	0.62309	0.627934
Virgin Islands, U.S.	Caribbean	Latin America and Caribbean	0.655161	0.664019	0.671082	0.676873	0.681982	0.68673	0.691248	0.695598	0.699769	0.703949	0.708437	0.713751	0.724398	0.73461	0.744614	0.754268	0.763447	0.772181	0.780343	0.787055	0.79322	0.798072	0.801093	0.803406	0.805641	0.807889	0.810199	0.812405	0.814825	0.817429	0.819602	0.821831
Yemen	North Africa and Middle East	North Africa and Middle East	0.215665	0.222885	0.230415	0.238025	0.245879	0.253963	0.262279	0.270783	0.279501	0.288261	0.297145	0.306112	0.315065	0.324082	0.333371	0.343463	0.353473	0.363301	0.37314	0.382762	0.392937	0.401472	0.409561	0.417642	0.42519	0.430198	0.434233	0.437549	0.440728	0.444001	0.446893	0.450376
Zambia	Eastern Sub-Saharan Africa	Sub-Saharan Africa	0.304009	0.305842	0.307316	0.30878	0.309223	0.309996	0.311327	0.313087	0.314926	0.317396	0.320625	0.324401	0.32868	0.333721	0.339489	0.346049	0.353541	0.362451	0.371688	0.381667	0.392471	0.403476	0.414575	0.425492	0.436244	0.446745	0.457123	0.467533	0.477888	0.487912	0.497486	0.505949
Zimbabwe	Southern Sub-Saharan Africa	Sub-Saharan Africa	0.398559	0.406053	0.412084	0.417974	0.424052	0.428929	0.434187	0.438142	0.441093	0.443247	0.444841	0.446355	0.446971	0.446002	0.443696	0.439652	0.434406	0.429165	0.422449	0.418331	0.417305	0.41973	0.425749	0.432882	0.439997	0.446553	0.452473	0.458425	0.464379	0.468384	0.471573	0.473819
